# Supplementary material for: Reaction-induced regioselective reconstruction of Ni-doped Ce(OH)3/CeO2 enables exceptional activity and selectivity for reverse water-shift reaction
Source: Research Square preprint supplement (doi:10.21203/rs.3.rs-5258008/v1), 2024-11-25
Supplement: Supplementary file 1 [file 615dbbaa92e867007a41bb1c.docx]

**Supplementary information**

**Reaction-induced regioselective reconstruction of Ni-doped Ce(OH)3/CeO2 enables** **exceptional activity and selectivity for** **reverse water-shift reaction**

Wenbin Li1,#, Bing Liu2,#, Qing Guo1, Wenjie Guo1, Sai Zhang1,3,* and Yongquan Qu1,*

*1* *School of Chemistry and Chemical Engineering,* *Northwestern Polytechnical University, Xi’an, 710072, China*

*2 Department of Chemical Engineering, School of Chemical and Material Engineering, Jiangnan University, Wuxi 214122, China*

*3* *Research & Development Institute of Northwestern Polytechnical University in Shenzhen, Shenzhen 518057, China*

Correspondence and requests for materials should be addressed to Zhang S. and Qu Y. Q. (Email: [zhangsai1112@nwpu.edu.cn](mailto:zhangsai1112@nwpu.edu.cn) and [yongquan@nwpu.edu.cn](mailto:yongquan@nwpu.edu.cn))

**Experimental Section**

***Synthesis of the Ce(OH)3/CeO2 nanorods***

Initially, 5 mL of aqueous Ce(NO3)3 solution (0.8 mmol mL-1) was added into 75 mL of aqueous NaOH solution (6.4 mmol mL-1) with continuous stirring at room temperature. After 30 min, the mixture was transferred to a Pyrex bottle (100 mL) for a hydrothermal process at 100 °C for 24 h. Finally, the Ce(OH)3/CeO2 pre-catalysts were washed alternatively with H2O and ethanol for three times and dried overnight at 60 ℃.

***Synthesis of*** ***the Ni-CeO2 catalysts***

The Ni-CeO2 catalysts were prepared by hydrothermal of the Ni-Ce(OH)3/CeO2 catalysts at 180 °C for 12 h. Then, the solids were collected by centrifugation and washed with copious of H2O. Finally, the catalysts were dried overnight at 60 ℃.

***Synthesis of the reconstructed Ni-Ce(OH)3/CeO2 and H2-treated Ni-Ce(OH)3/CeO2 catalysts***

The Ni-Ce(OH)3/CeO2 per-catalysts were treated by a flow of H2:CO2 (a ratio of 3:1, 50 mL min-1) at 600 ℃ for 2 h, resulting in the reconstructed Ni-Ce(OH)3/CeO2 catalysts.

The Ni-Ce(OH)3/CeO2 per-catalysts were treated by H2/Ar (10 *vol.*%, 50 mL min-1) at 600 ℃ for 2 h, giving the H2-treated Ni-Ce(OH)3/CeO2 catalysts.

***Characterizations***

Transmission electron microscope (TEM) characterizations were conducted using a JEOL2100F instrument operating an accelerating voltage of 200 kV. The high angle annular dark-field scanning transmission electron microscopy (HAADF-STEM) and element mapping analyses were performed on a FEI Tecnai F30 microscope operated at 300 kV. X-ray photoelectron spectroscopy (XPS) profiles were acquired from a Thermo Electron Model K-Alpha with Al Ka as the excitation source. The Ni contents in various catalysts were determined by inductively coupled plasma optical emission spectrometer (ICP-OES). Alpha300R micro confocal Raman spectrometer (Raman) produced by German WITec Company was used to analyze the surface defects.

***Experimental details of hydrogen temperature programmed reduction (H2-TPR)***

H2-TPR measurements were performed on the Auto Chem 2920 chemisorbent. Initially, 100 mg of catalyst was loaded into the sample tube, and then pretreated at 350 ℃ in an Ar atmosphere for 1 h (50 mL min-1). Once the temperature was lowered to 50 ℃, the gas was switched to a mixture of 10 *vol.*% H2/Ar (50 mL min-1). Subsequently, the temperature was gradually increased from 50 ℃ to 800 ℃ with a ramping rate of 10 ℃ min-1. Thermal conductivity detection (TCD) was used to monitor the consumption of hydrogen during the reduction process.

***Experimental details of CO2 and CO temperature programmed reduction (TPD)***

The CO2-TPD experiments were conducted on the Auto Chem 2920 Chemisorbent. Typically, 100 mg of sample was pretreated at 200 ℃ in an Ar atmosphere for 0.5 h (50 mL min-1). After cooling down to 50 ℃, the gas was switched to CO2 (50 mL min-1) for adsorption of 0.5 h, and then purged with He (50 mL min-1) for 1 h. Under the He atmosphere, the temperature was raised from 50 ℃ to 800 °C with a heating rate of 10 °C min-1.

The CO-TPD experiments were also performed using the Auto Chem 2920 Chemisorbent. Initially, 100 mg of sample was pre-treated at 200 ℃ in Ar atmosphere for 0.5 h (50 mL min-1). After cooling down to 50 ℃, the gas was switched to CO (50 mL min-1) for a 0.5 h adsorption period, and then purged with (50 mL min-1) He for 1 h. Under the He atmosphere, the temperature was gradually increased from 50 ℃ to 800 °C with a ramping rate of 10 °C min-1.

***Calculations of reaction equilibrium***

The gas-phase thermochemical data of reactants at various temperatures are obtained from the NIST Chemistry WebBook. According to the equation of the RWGS reaction, *H* and *S* of reactants and products at different temperatures are used to calculate *ΔH* and *ΔS*. Then, the thermodynamic state function *ΔG* is calculated using the formula of *ΔG=ΔH*–T×*ΔS.* Afterwards, the reaction equilibrium constant (*K*) is derived from the following formula.

Where R is the gas constant and T is the absolute temperature.

The chemical equilibrium at each temperature is calculated according to the ratio of hydrogen and carbon dioxide (H2: CO2 =3:1) in the reaction conditions. The specific equation used for the calculations is as follows:

Here, CO, H2O, H2 and CO2 represent the concentrations of CO, H2O, H2 and CO2 at the specific temperature, respectively.

***Reaction order calculations***

The reaction orders of different reactants are determined by the reaction rate equation of RWGS, as follows:

In the formula, *rCO* represents the rate of the CO generation, *k* is the reaction rate constant, *PCO2* represents the partial pressure of CO2 under the reaction conditions, *PH2* represents the partial pressure of H2 under the reaction conditions, *α* represents the reaction order of CO2, *β* represents the reaction order of H2.

***Computational Methods***

All the spin-polarized density functional theory (DFT) calculations were performed by using the Vienna ab initio simulation package (VASP).1,2 To accurately treat the Ce 4f orbital, a correction for Coulomb and exchange interactions (DFT+U) was employed by setting Ueff = 5.0 eV (Ueff = coulomb U – exchange J) applied to the Ce 4f state, according to previous studiy.3 The D3 correction method (DFT-D3) was employed in order to include van der Waals (vdW) interations.4 The projector-augmented wave (PAW) method was used to represent core-valence interations.5 Valence electrons were described by a plane wave basis with an energy cutoff of 400 eV. The generalized gradient approximation with the Perdew-Burke-Ernzerhof (GGA-PBE) functional was used to model electronic exchange and correlation.6 Electron smearing was employed via Gaussian smearing method with a smearing width consistent to 0.05 eV. The conjugate gradient algorithm was used in geometry optimization calculations. The force convergence criteria and energy convergence criteria were set to 0.03 eV/Å and 10-5 eV, respectively. The Brillouin zone was sampled at the Γ-point. A fluorite face-centered cubic Ce4O8 cell with *Fmm* space group was used to model the CeO2 unit cell. The calculated lattice parameter for CeO2 was 5.437 Å, which well matches the experimental value (5.412 Å).7


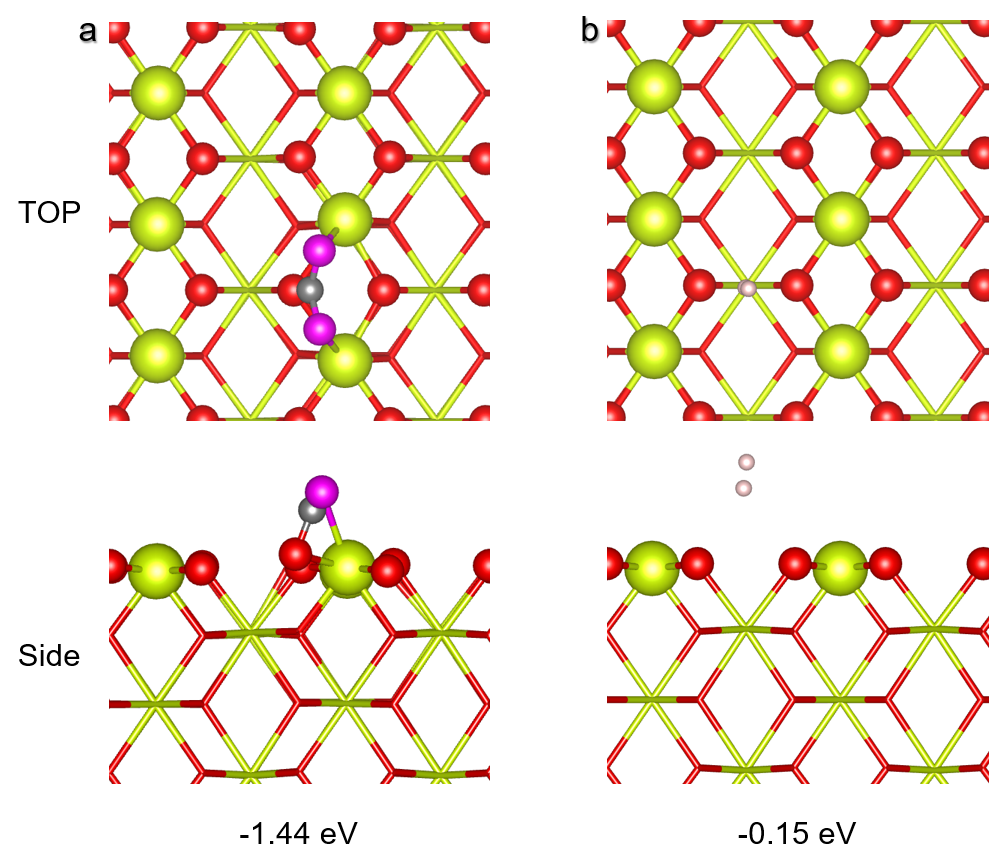


**Figure S1.** **Adsorption behaviors of reactants on the ideal CeO2(110) surface.** The optimized adsorption configurations of (**a**) CO2 and (**b**) H2 on the ideal CeO2(110) surface.


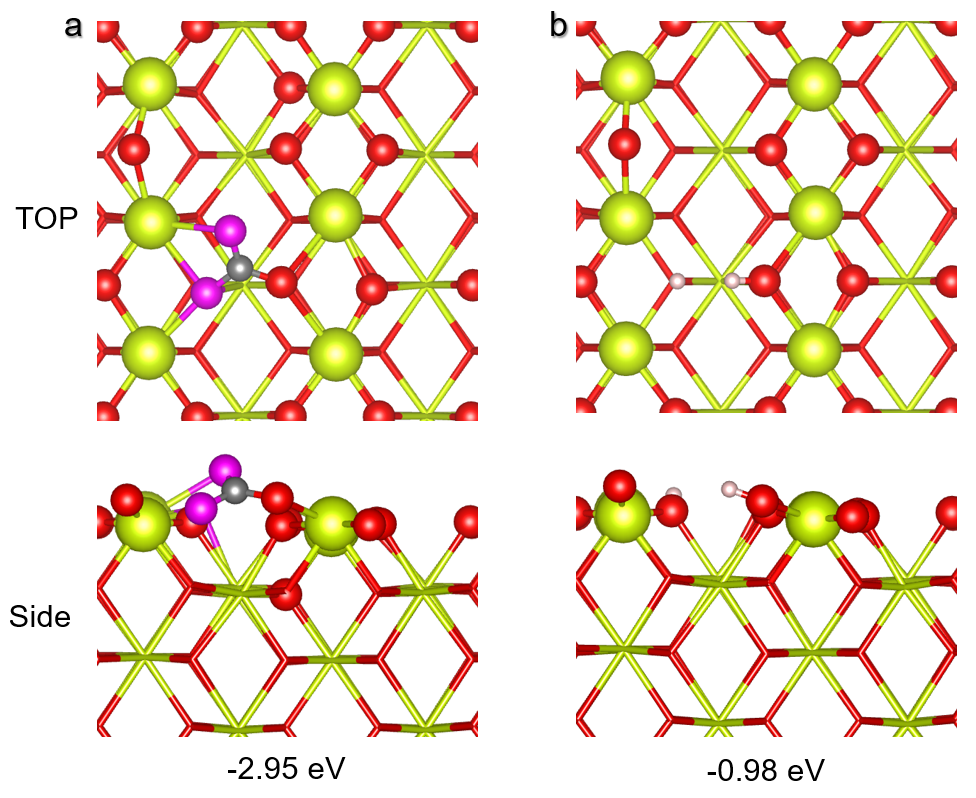


**Figure S2.** **Adsorption behaviors of reactants on the FLP sites of CeO2(110) surface.** The optimized adsorption configurations of (**a**) CO2 and (**b**) H2 on the FLP sites of CeO2(110) surface.


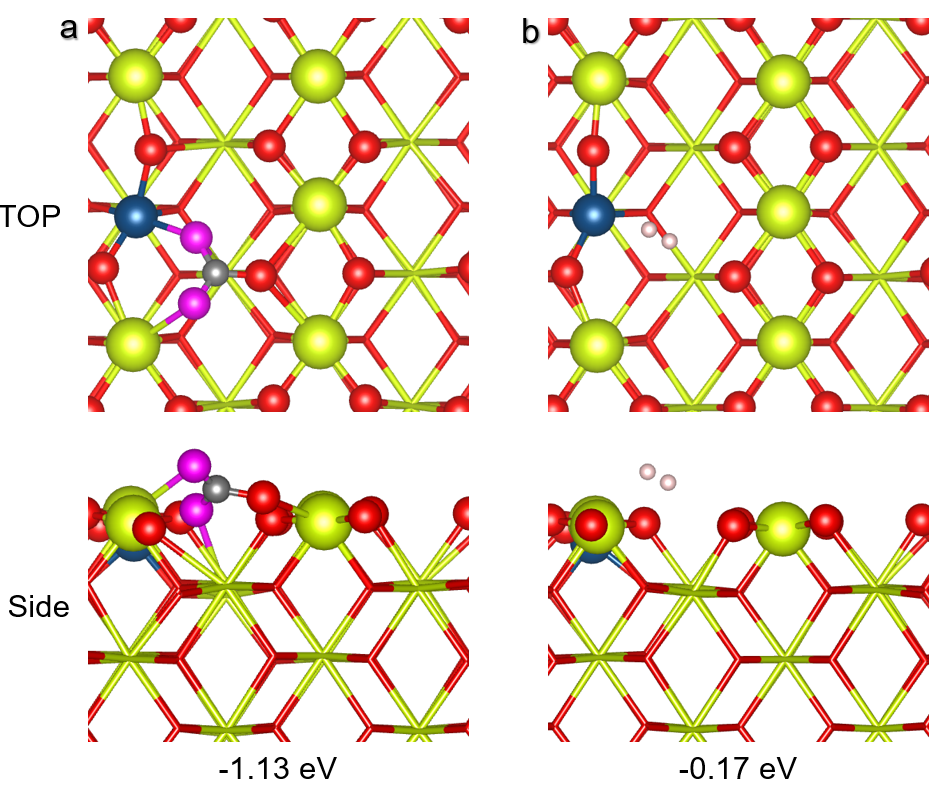


**Figure S3.** **Adsorption behaviors of reactants on the FLP sites of CeO2(110)-Nisurf surface.** The optimized adsorption configurations of (**a**) CO2 and (**b**) H2 on the FLP sites of CeO2(110)-Nisurf surface.


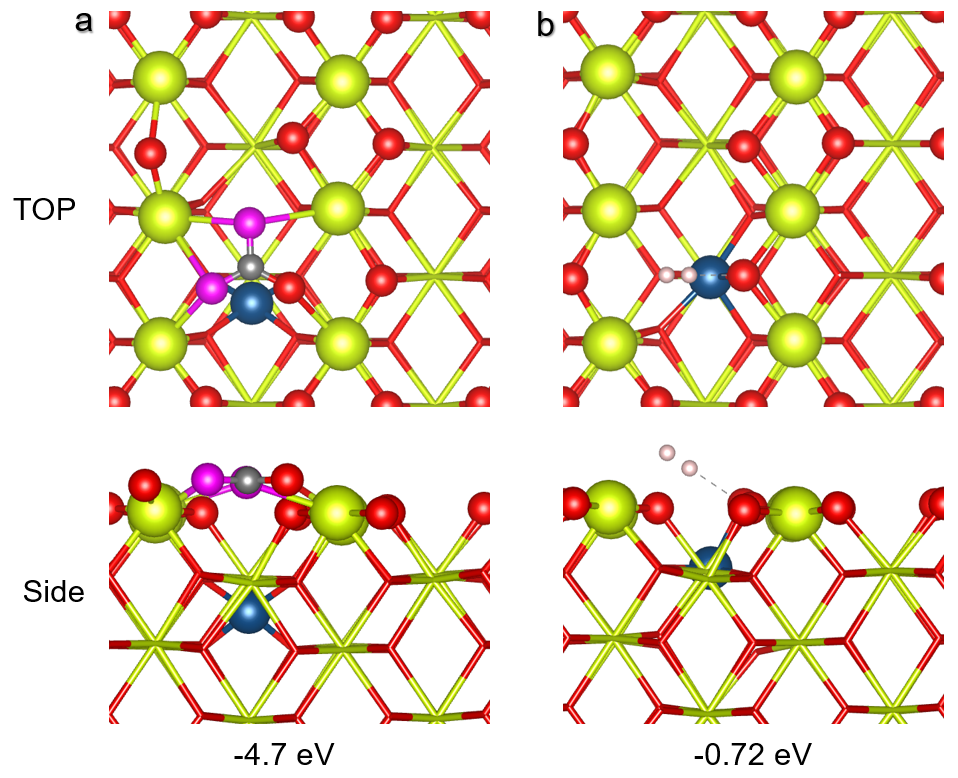


**Figure S4.** **Adsorption behaviors of reactants on** **the FLP sites of CeO2(110)-Nisub surface.** The optimized adsorption configurations of (**a**) CO2 and (**b**) H2 on the FLP sites of CeO2(110)-Nisub surface.


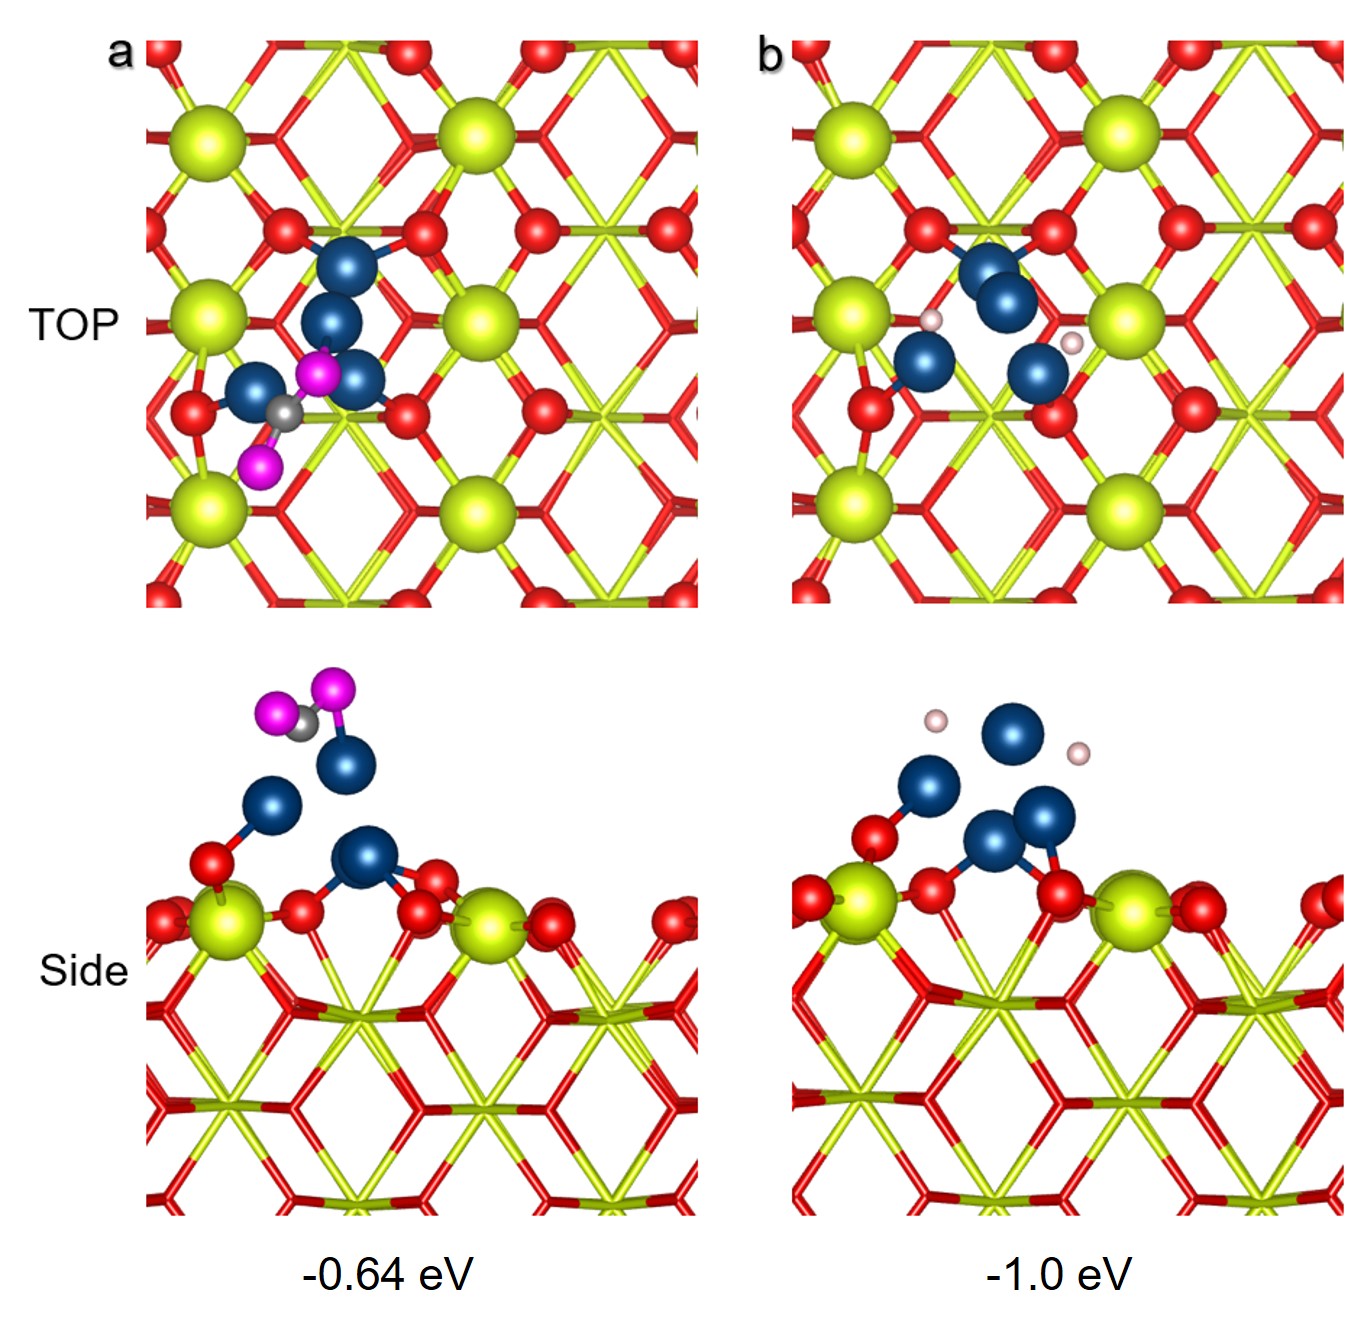


**Figure S5.** **Adsorption behaviors of reactants on** **Ni4 cluster of Ni4/CeO2(110) surface.** The optimized adsorption configurations of (**a**) CO2 and (**b**) H2 on Ni4 cluster of Ni4/CeO2(110) surface.


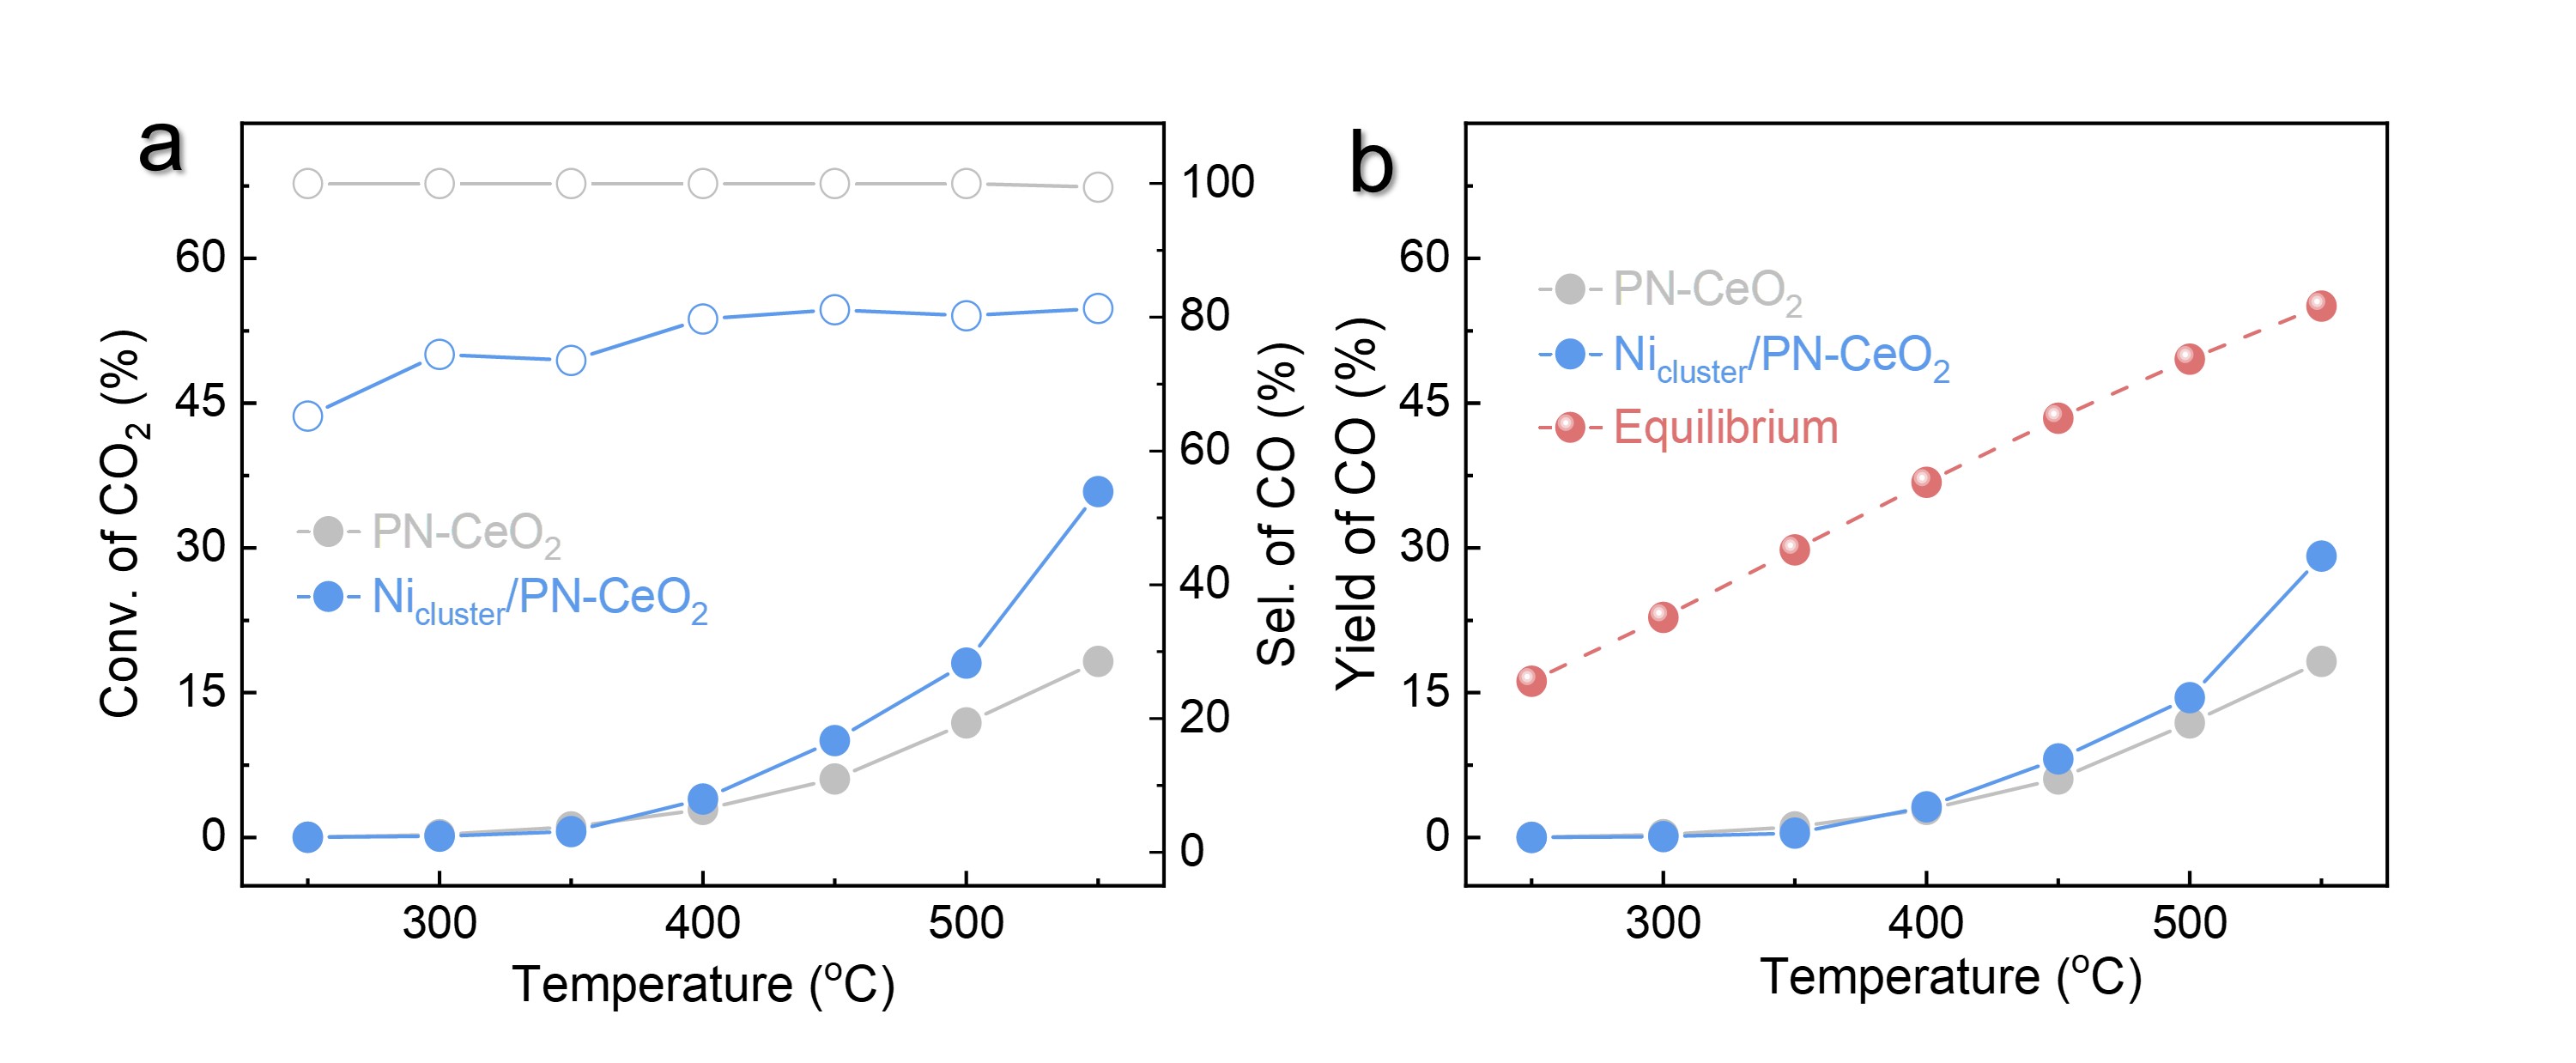


**Figure S6. Catalytic performance of PN-CeO2 and Nicluster/PN-CeO2 for RWGS reaction.** (**a**) CO2 conversions and CO selectivity. (**b**) CO yields. **Note:** The PN-CeO2 catalysts have been demonstrated with the abundant FLP sites in our previous reports8,9. The Nicluster/PN-CeO2 catalysts exhibited the dual-active sites of Ni clusters and FLP sites. **Reaction conditions:** catalysts (50 mg), WHSV (72,000 mL gcat-1 h-1), H2:CO2:N2 of 3:1:8.


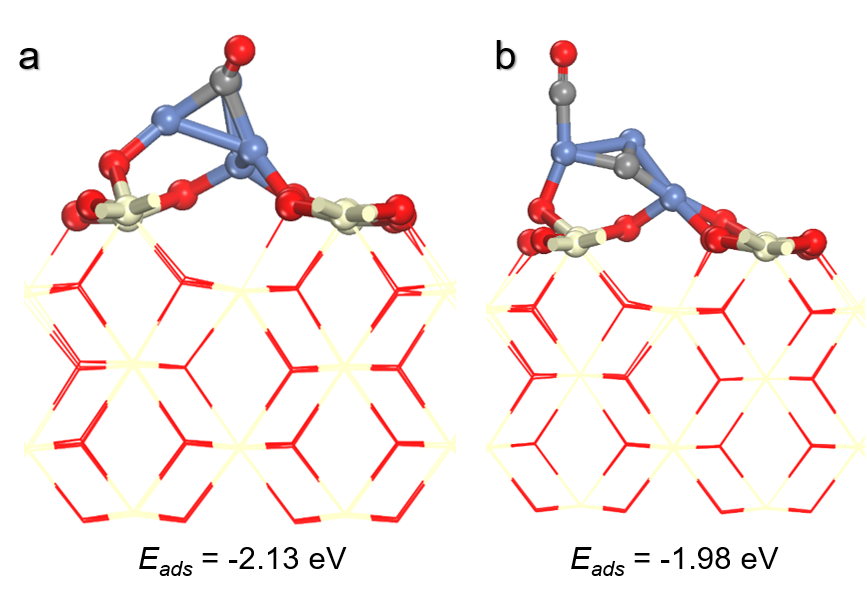


**Figure S7. Adsorption behaviors of CO on various catalysts.** The optimized adsorption configurations of CO on the (**a**) Ni4/CeO2(110)-2OV and (**b**) carburized Ni4/CeO2(110)-2OV surfaces.


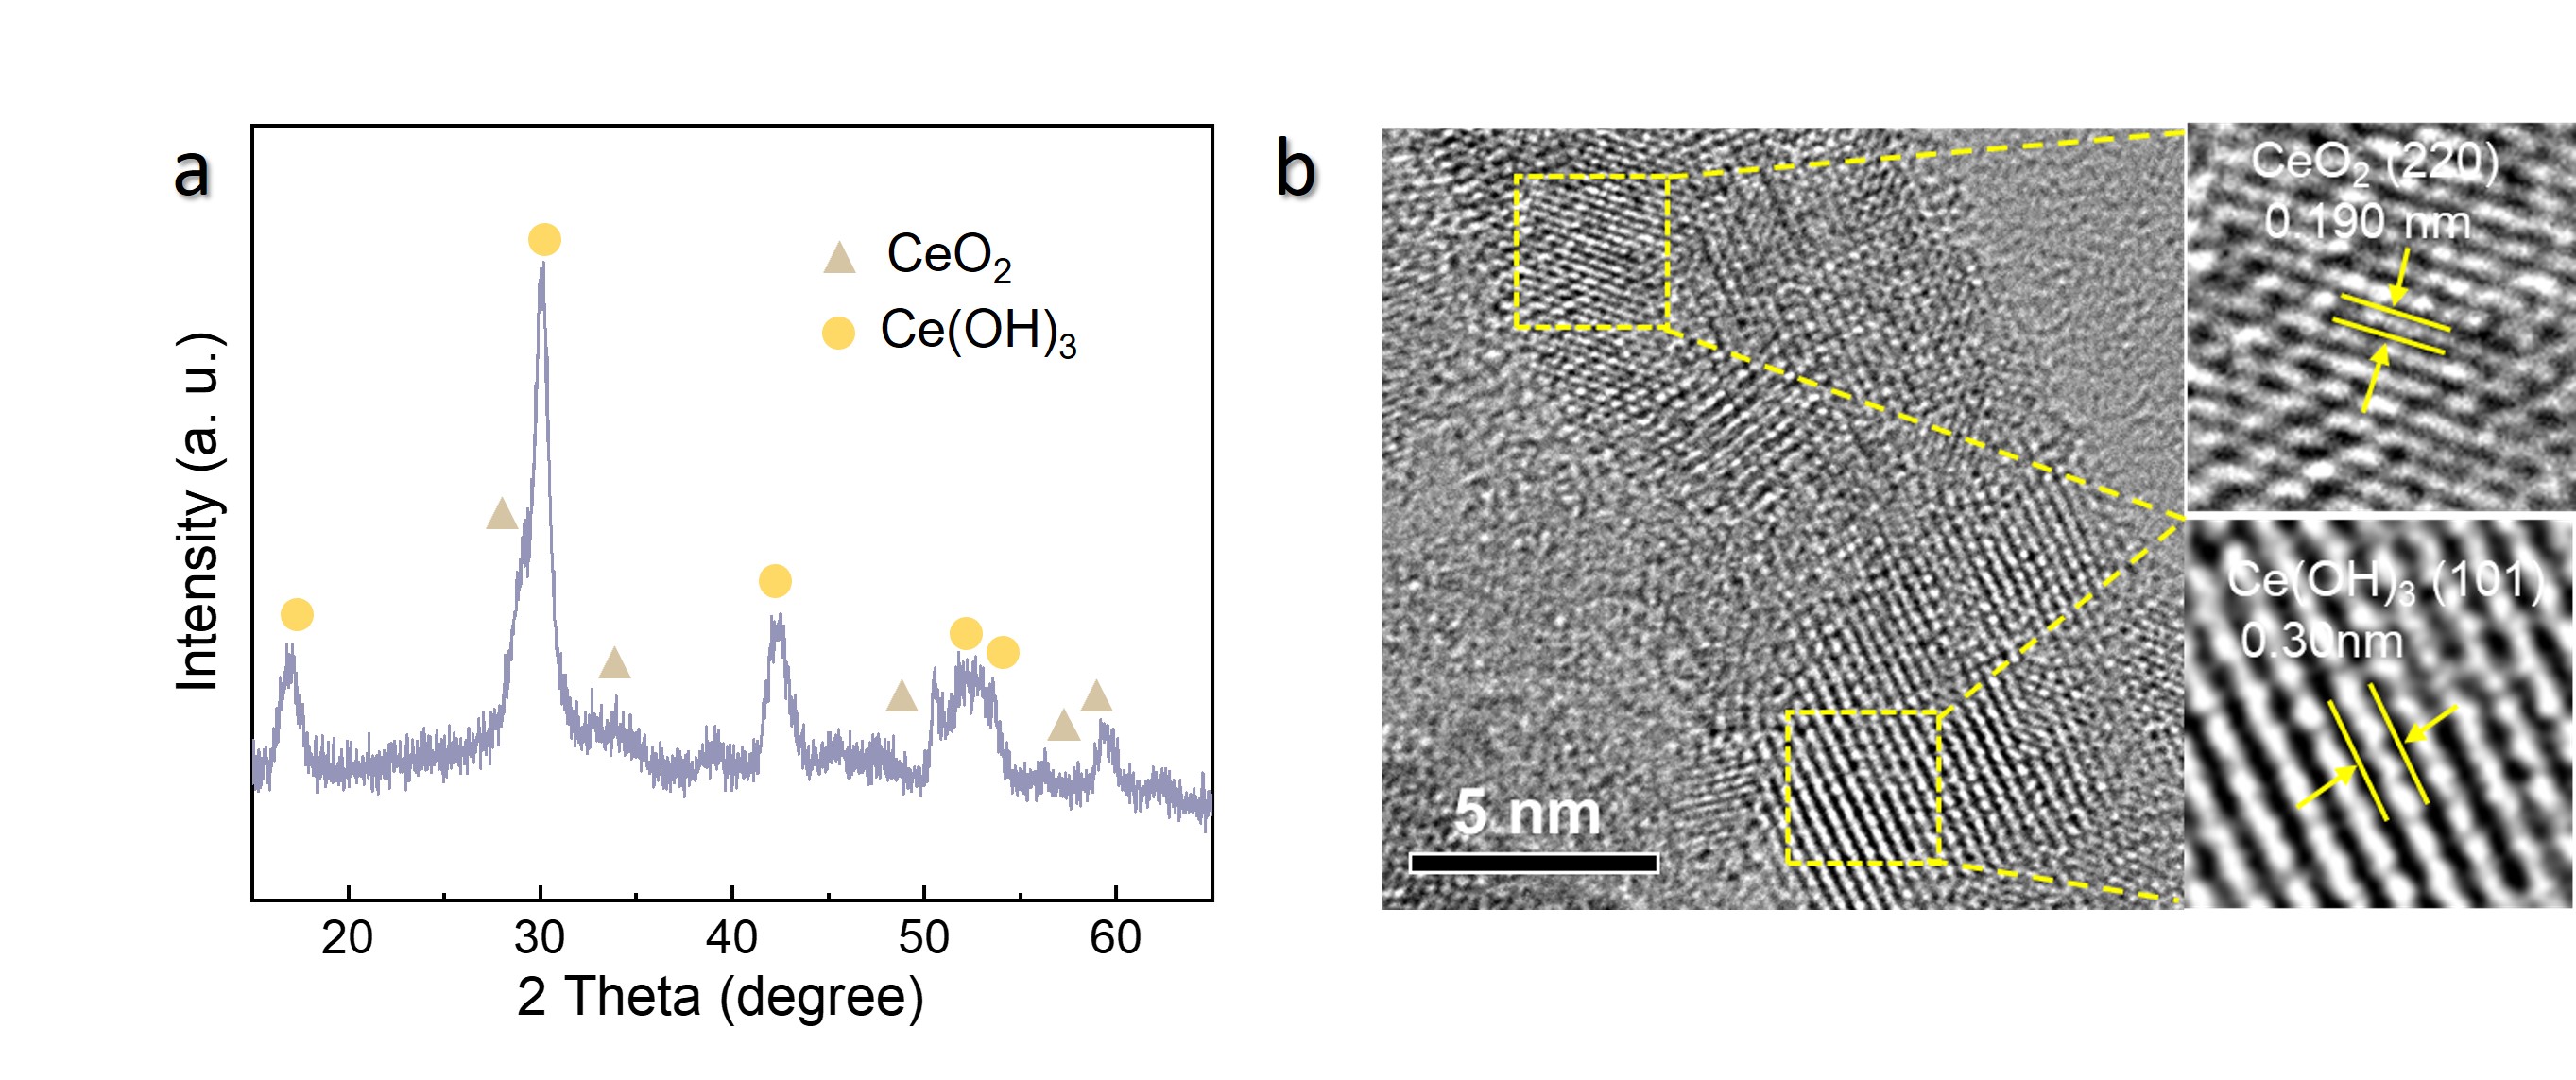


**Figure S8. Characterizations of the Ce(OH)3/CeO2 pre-catalysts.** (**a**) XRD pattern and (**b**) HR-TEM image.


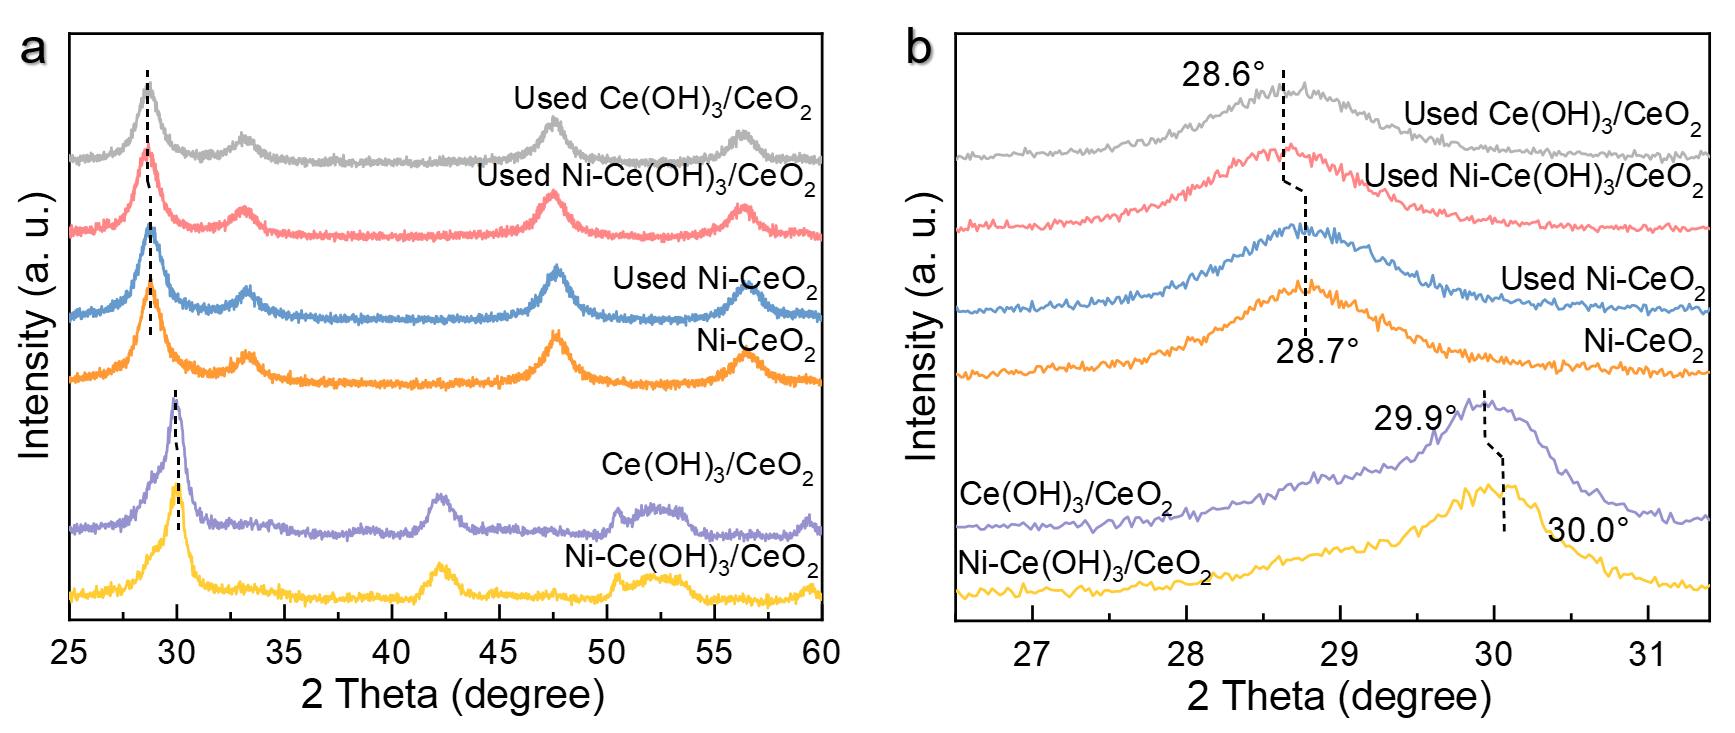


**Figure S9. XRD analysis.** (**a**) XRD and (**b**) locally magnified XRD patterns of the Ce(OH)3/CeO2, Ni-CeO2 and Ni-Ce(OH)3/CeO2 catalysts before and after the RWGS reaction.


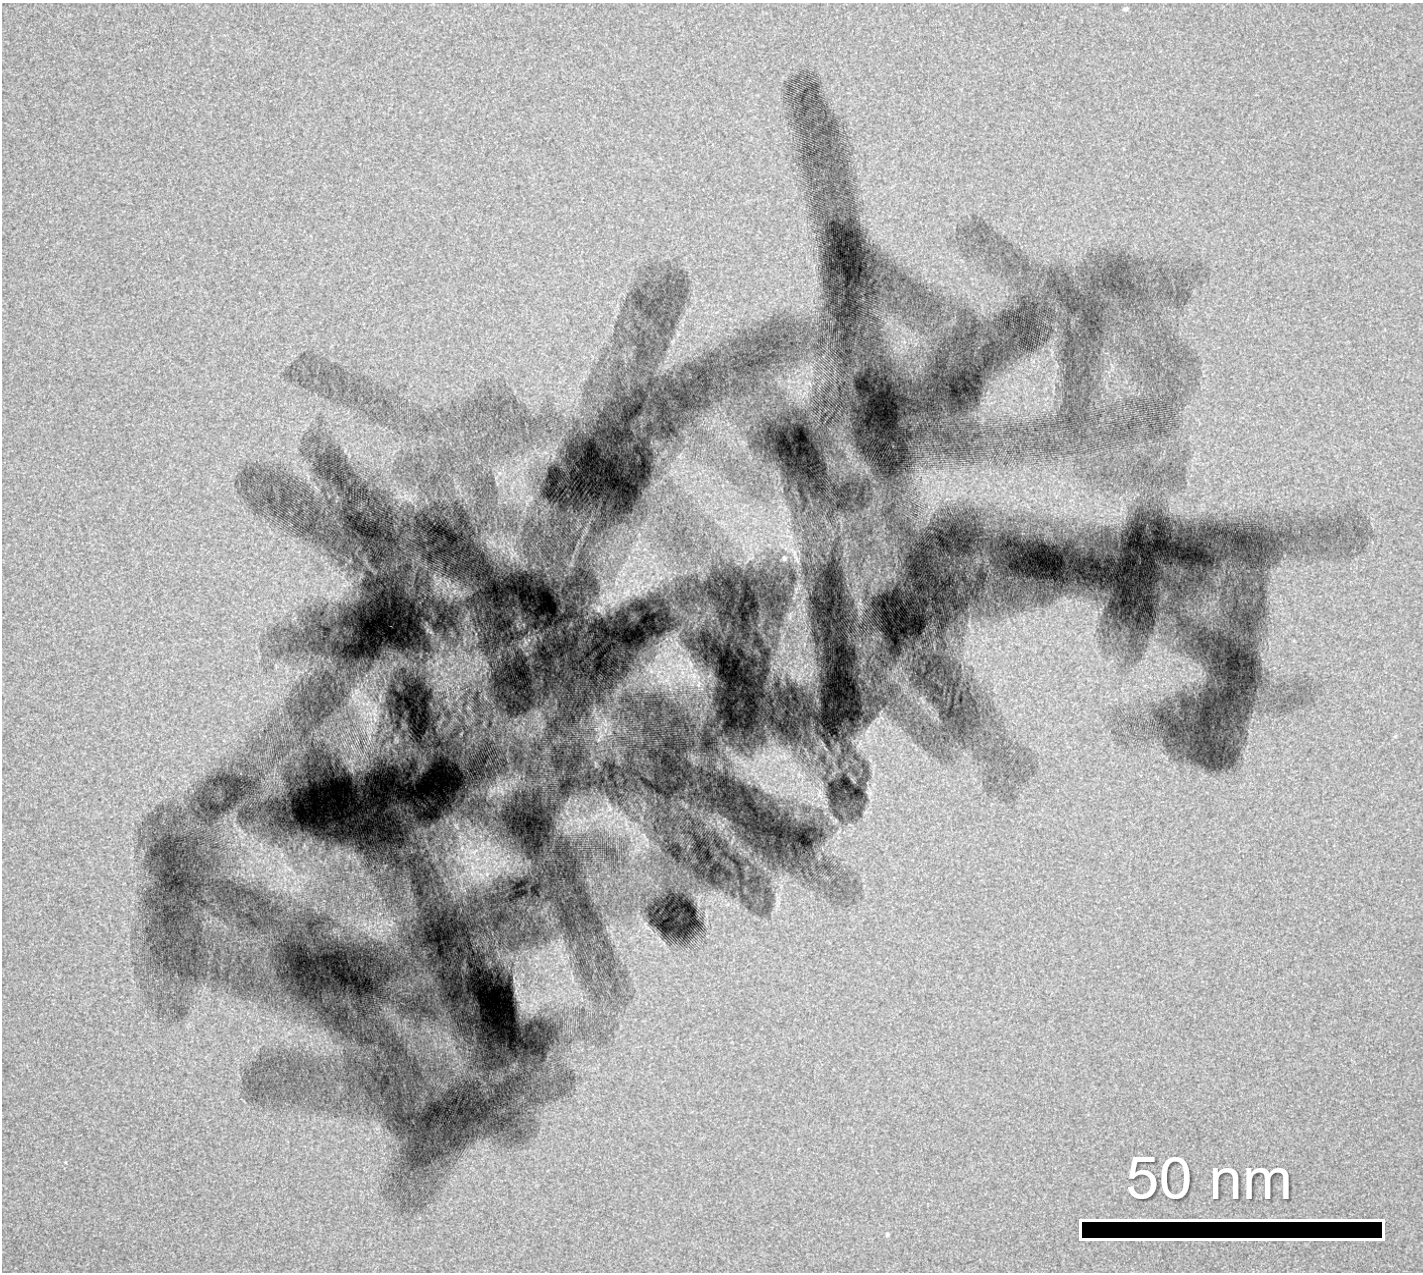


**Figure S10.** **TEM image of the Ni-Ce(OH)3/CeO2 pre-catalysts.**


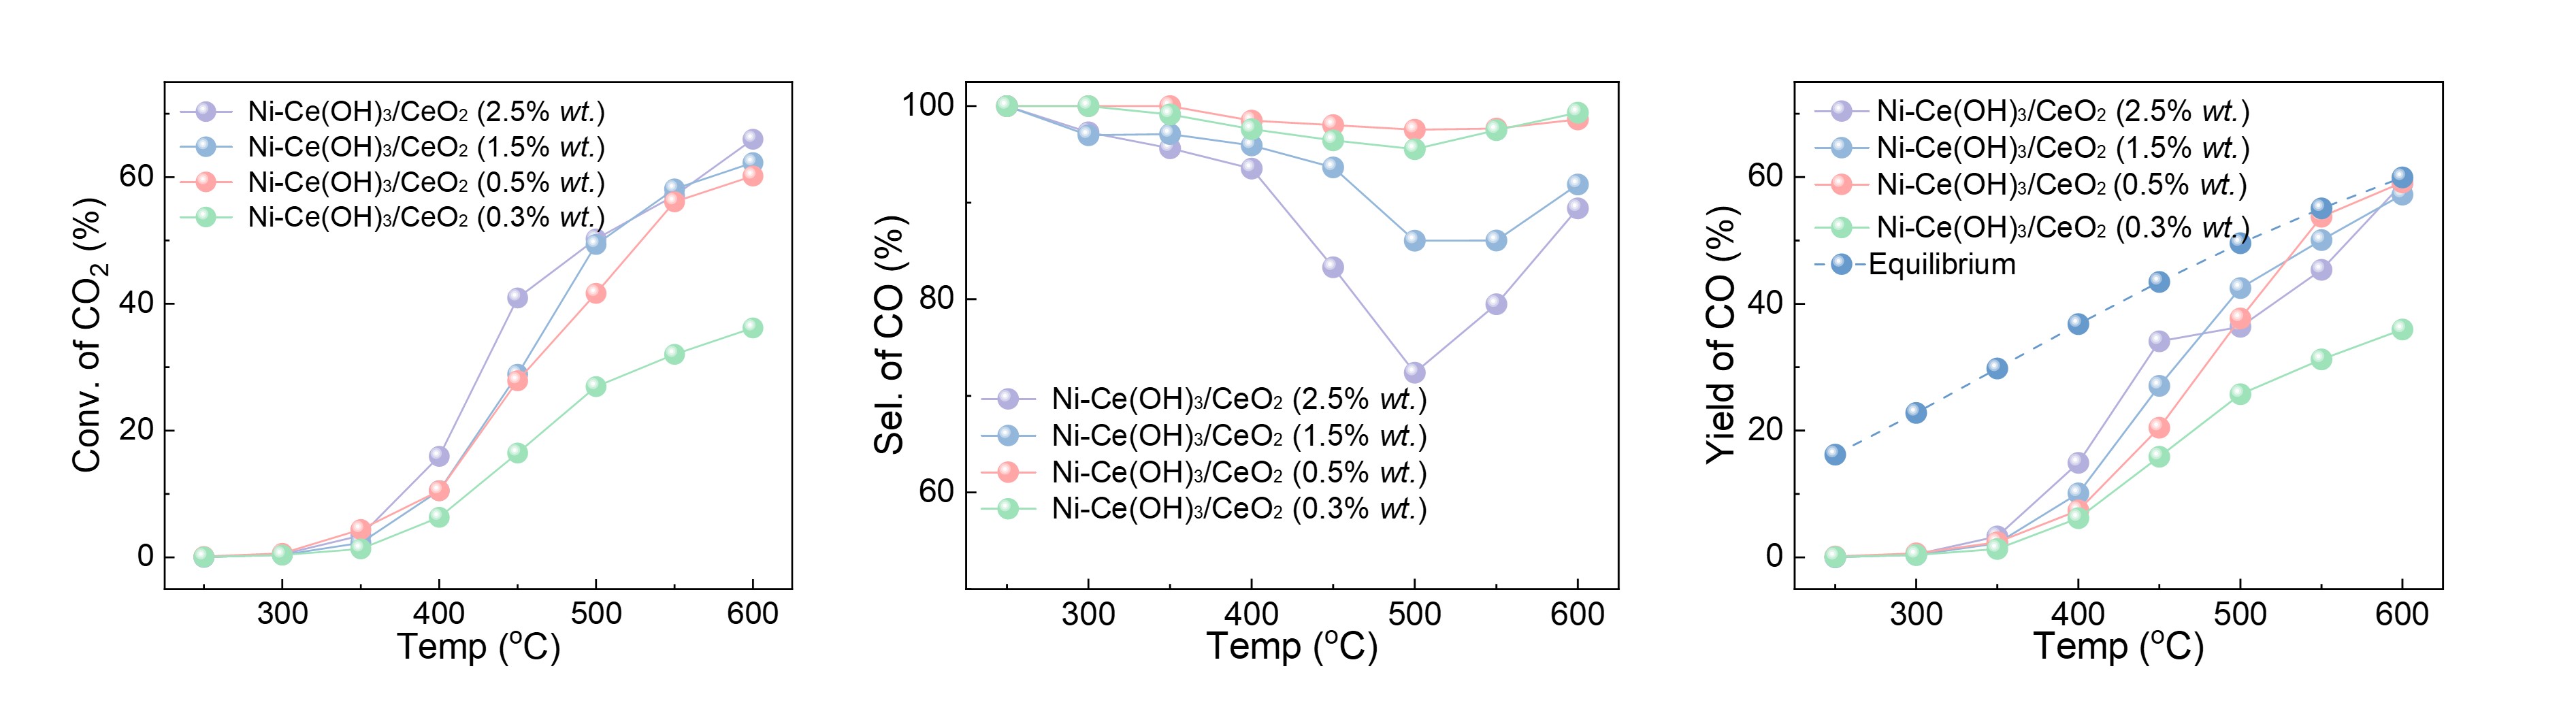


**Figure S11. Catalytic performance of Ni-Ce(OH)3/CeO2 with various Ni loadingfor RWGS.** (**a**) CO2 conversions, (**b**) CO selectivity and (**c**) CO yields of various Ni-Ce(OH)3/CeO2 catalysts for the RWGS reaction. **Reaction conditions:** catalysts (50 mg), WHSV (72,000 mL gcat-1 h-1), H2:CO2:N2 of 3:1:8.


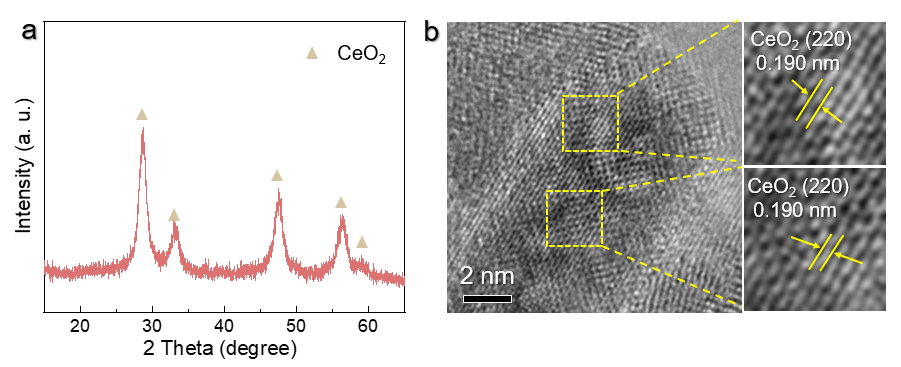


**Figure S12.** **Characterizations of the Ni-CeO2 catalysts.** (**a**) XRD pattern and (**b**) HR-TEM image.


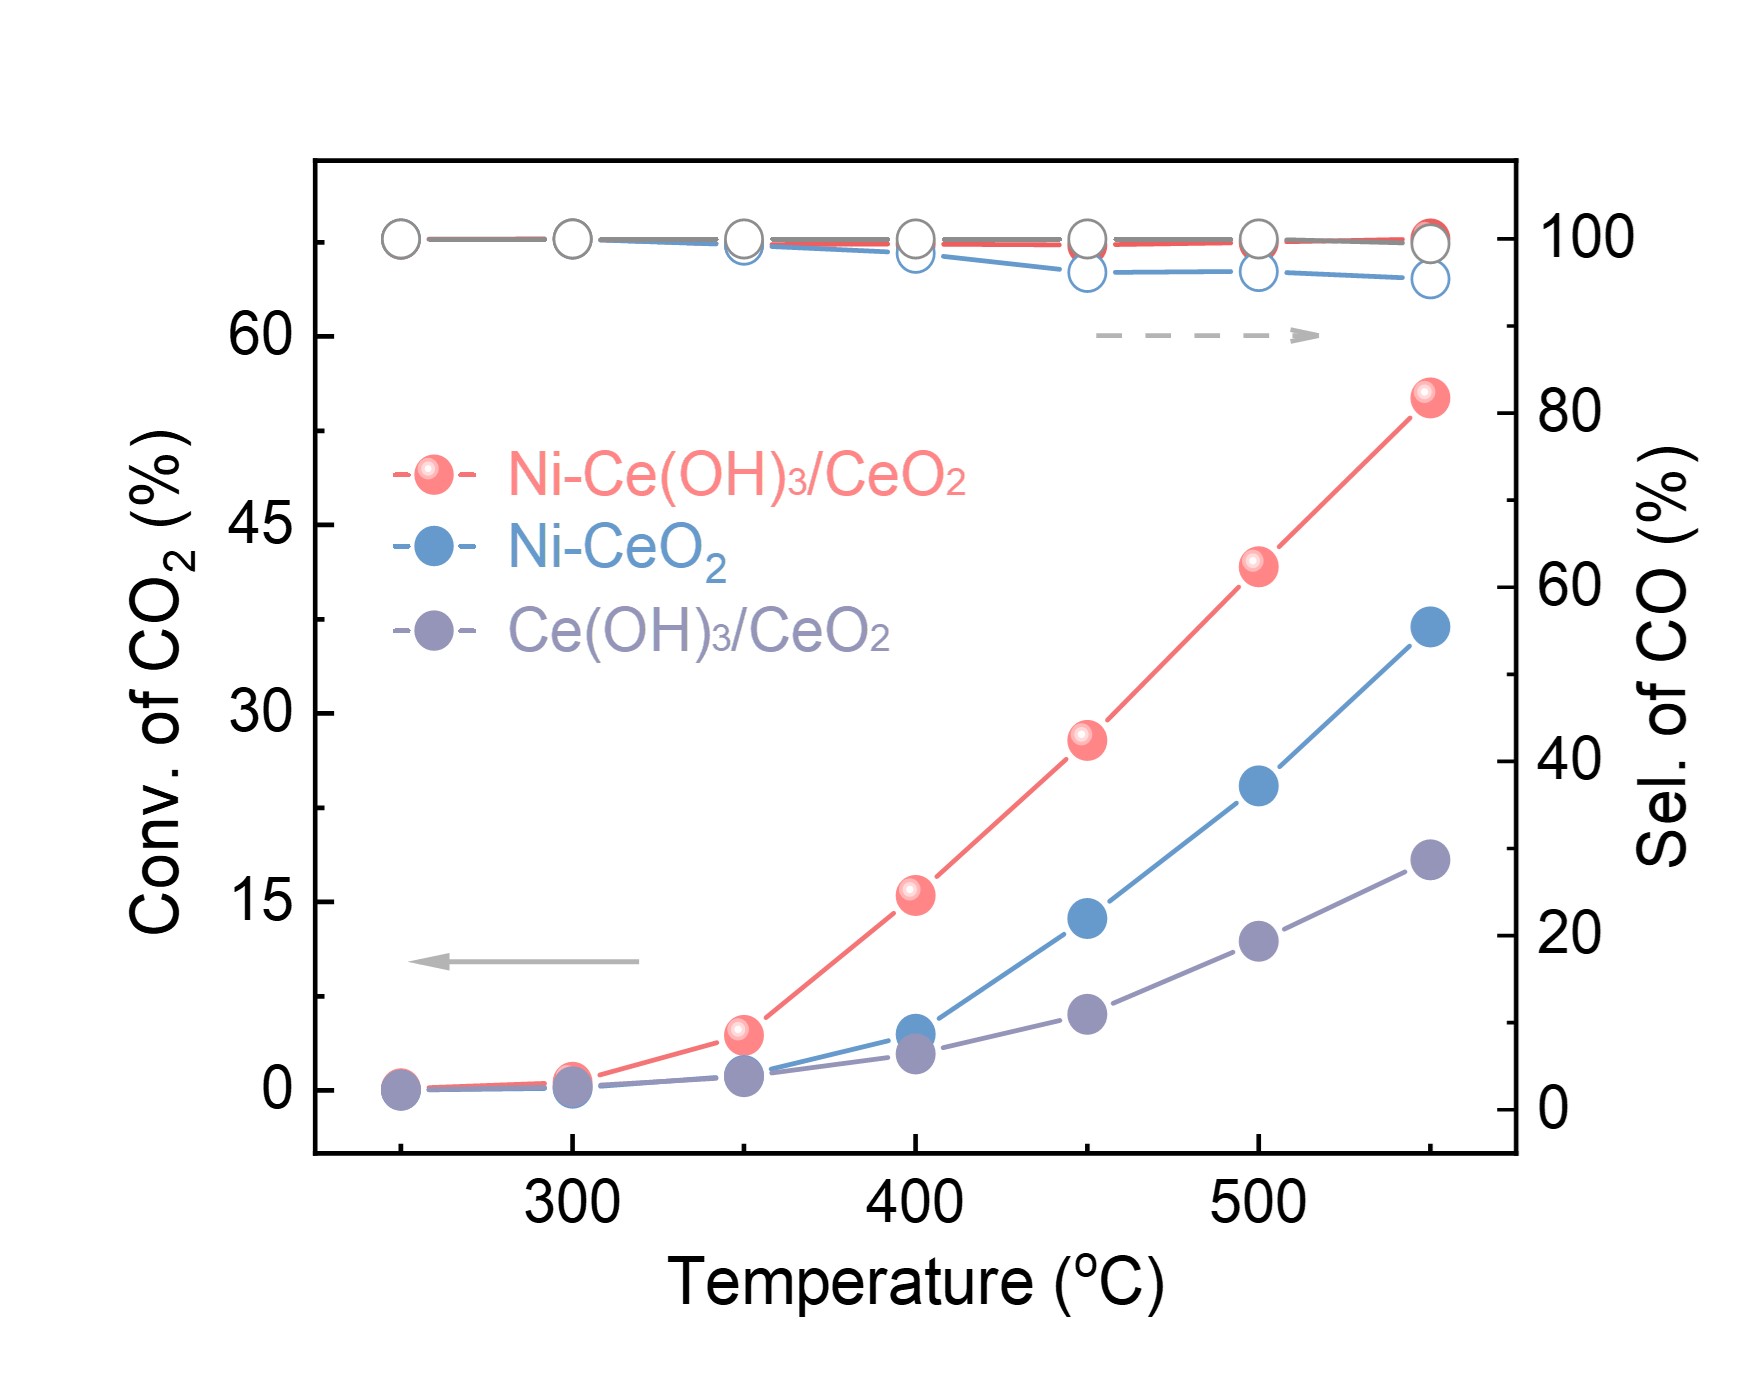


**Figure S13. Catalytic performance of the Ni-Ce(OH)3/CeO2, Ni-CeO2 and Ce(OH)3/CeO2 catalysts for RWGS reaction. Reaction conditions:** catalysts (50 mg), WHSV (72,000 mL gcat-1 h-1), H2:CO2:N2 of 3:1:8.

**
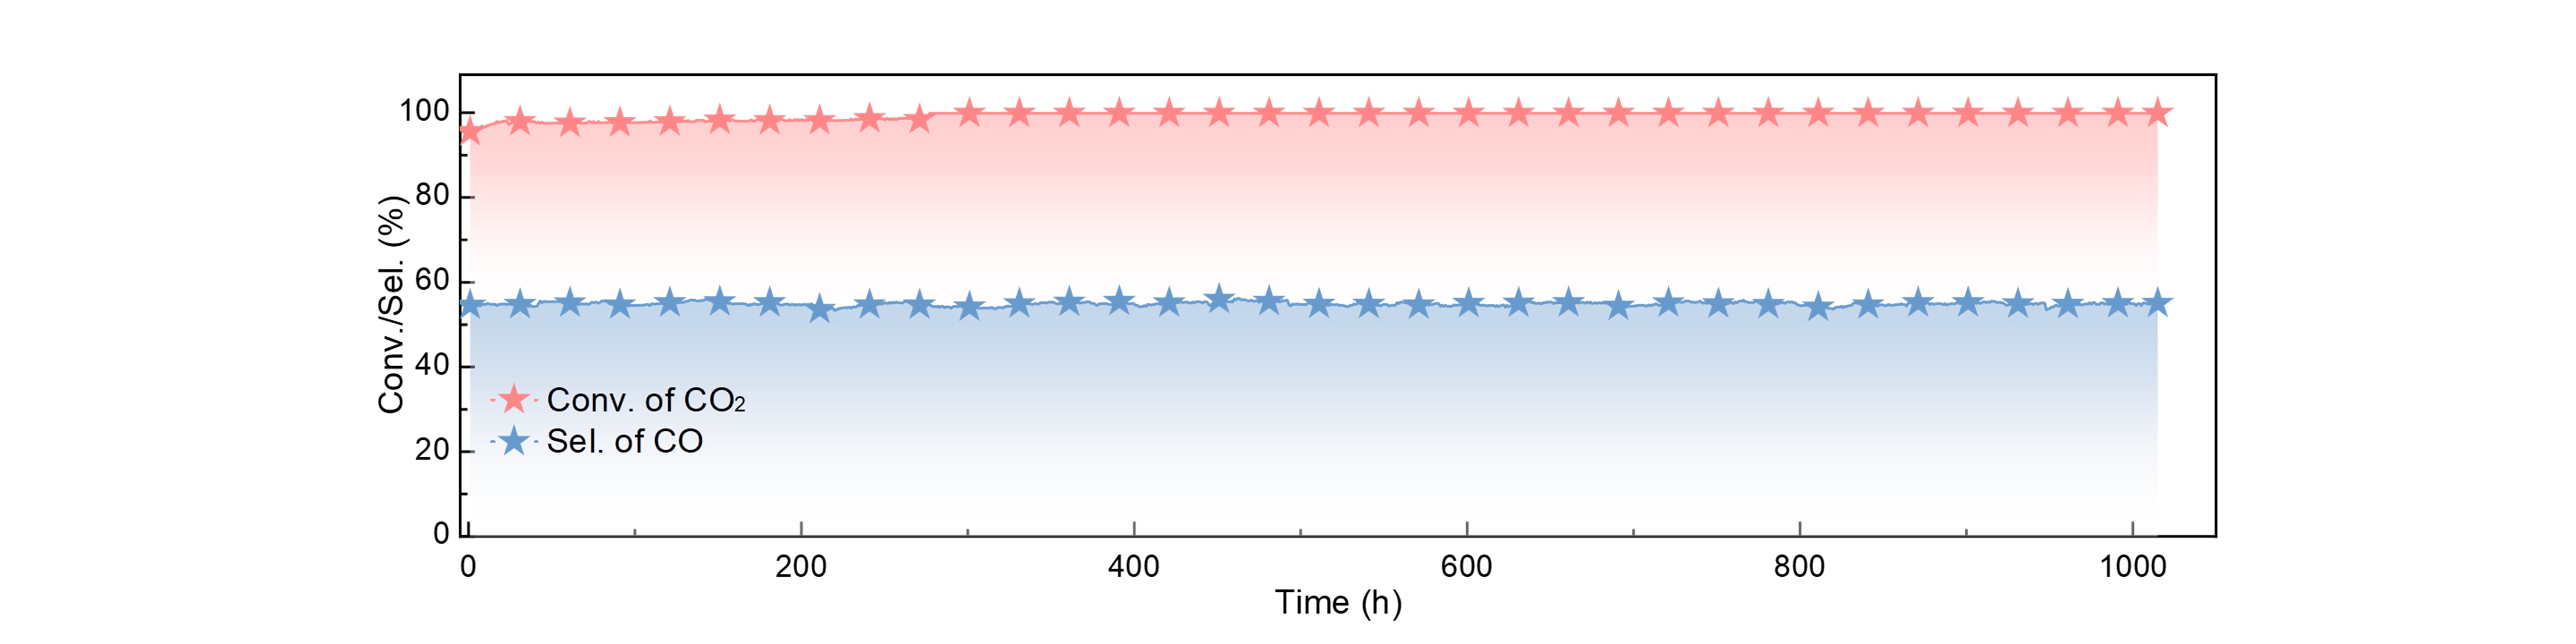
**

**Figure S14. Catalytic stability of Ni-Ce(OH)3/CeO2 for the RWGS reaction at 550 ℃ temperatures. Reaction conditions:** Ni-Ce(OH)3/CeO2 (50 mg), WHSV (72,000 mL gcat-1 h-1), H2:CO2:N2 of 3:1:8, 550 °C.


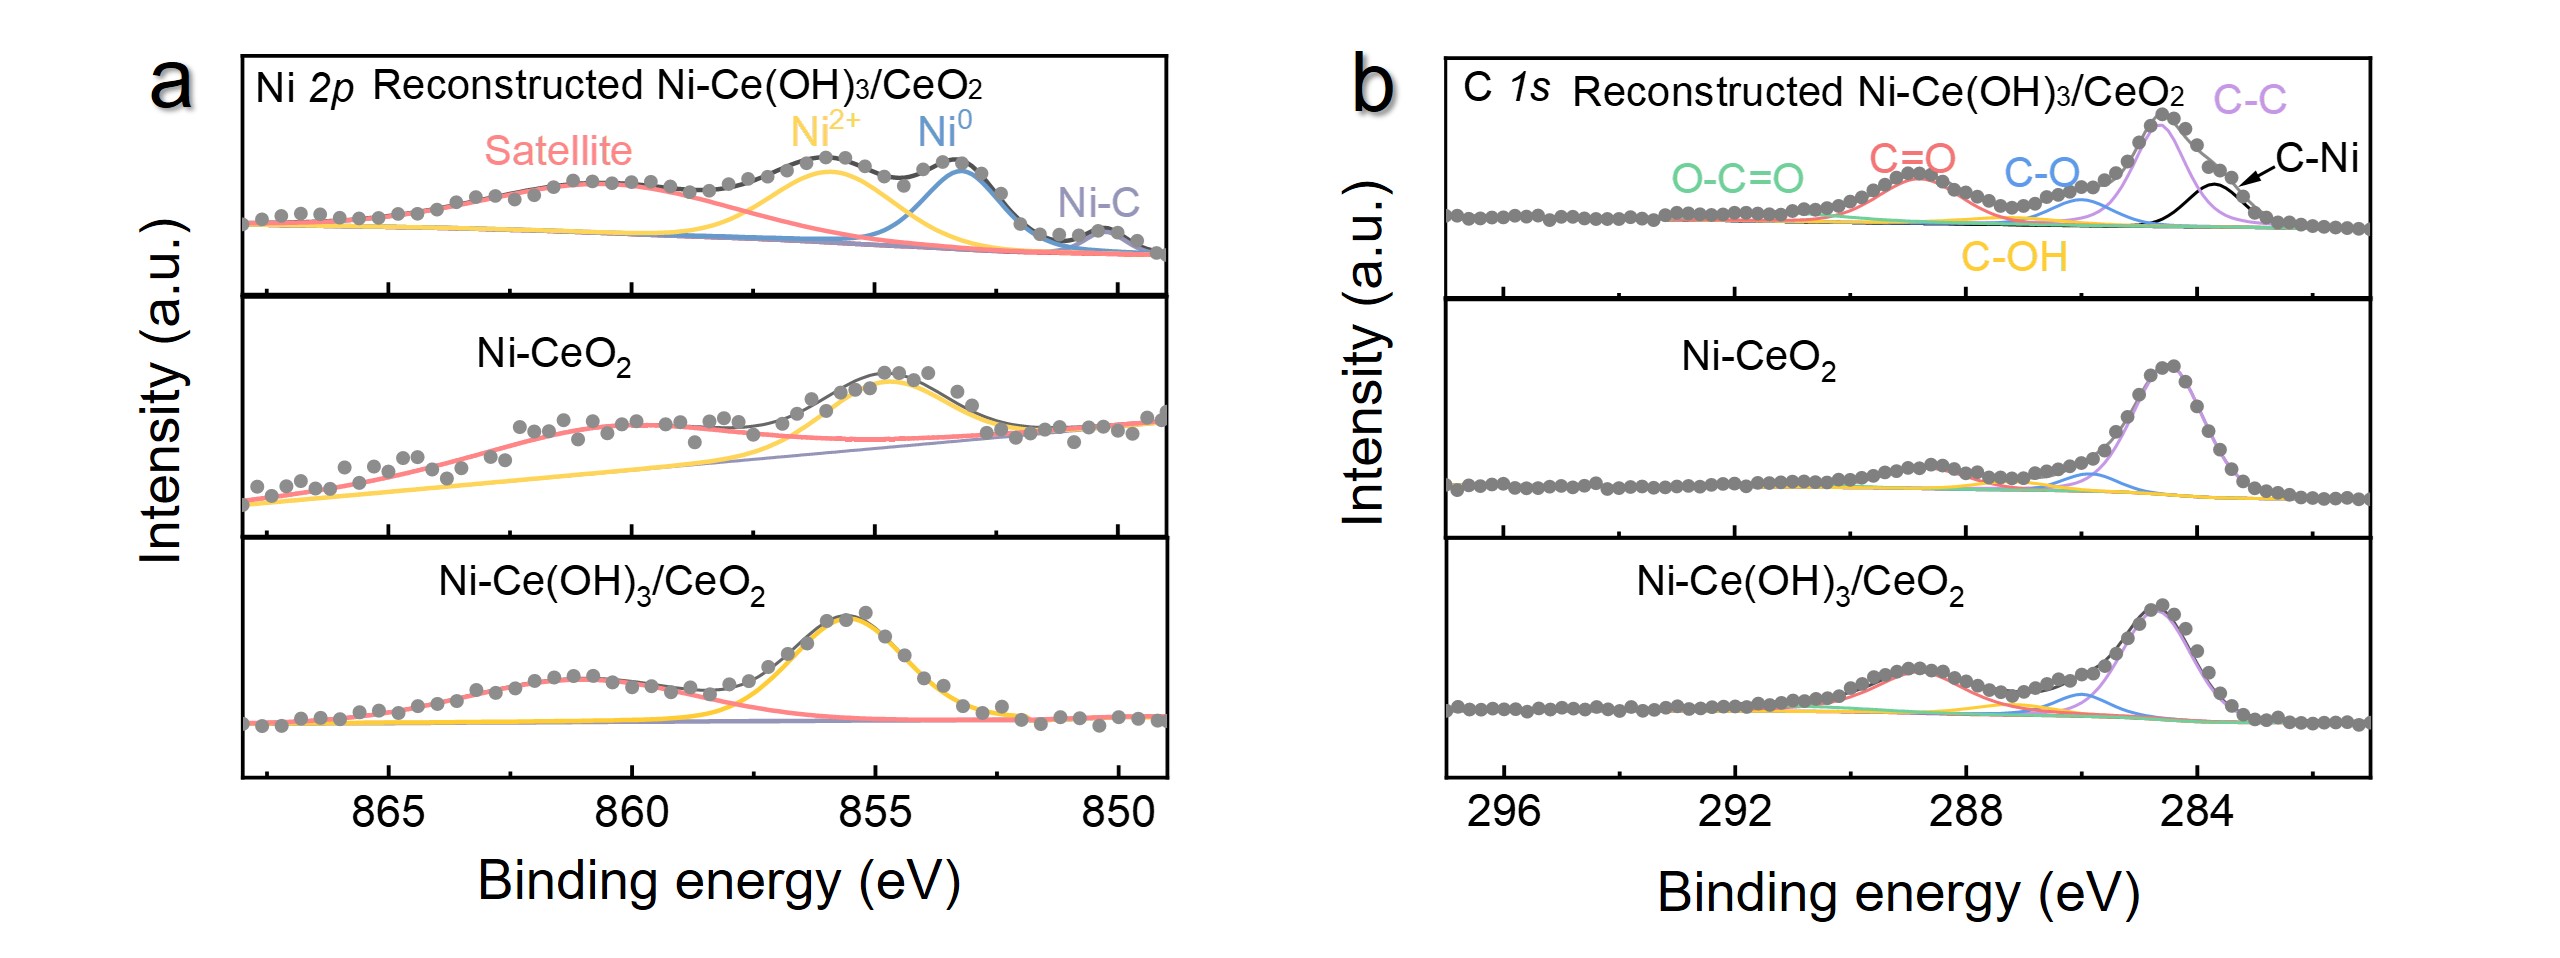


**Figure S15. XPS analysis.** XPS analysis of (**a**) Ni 3*d* and (**b**) C 1*s* peaks for the Ni-Ce(OH)3/CeO2, reconstructed Ni-Ce(OH)3/CeO2 and Ni-CeO2 catalysts.


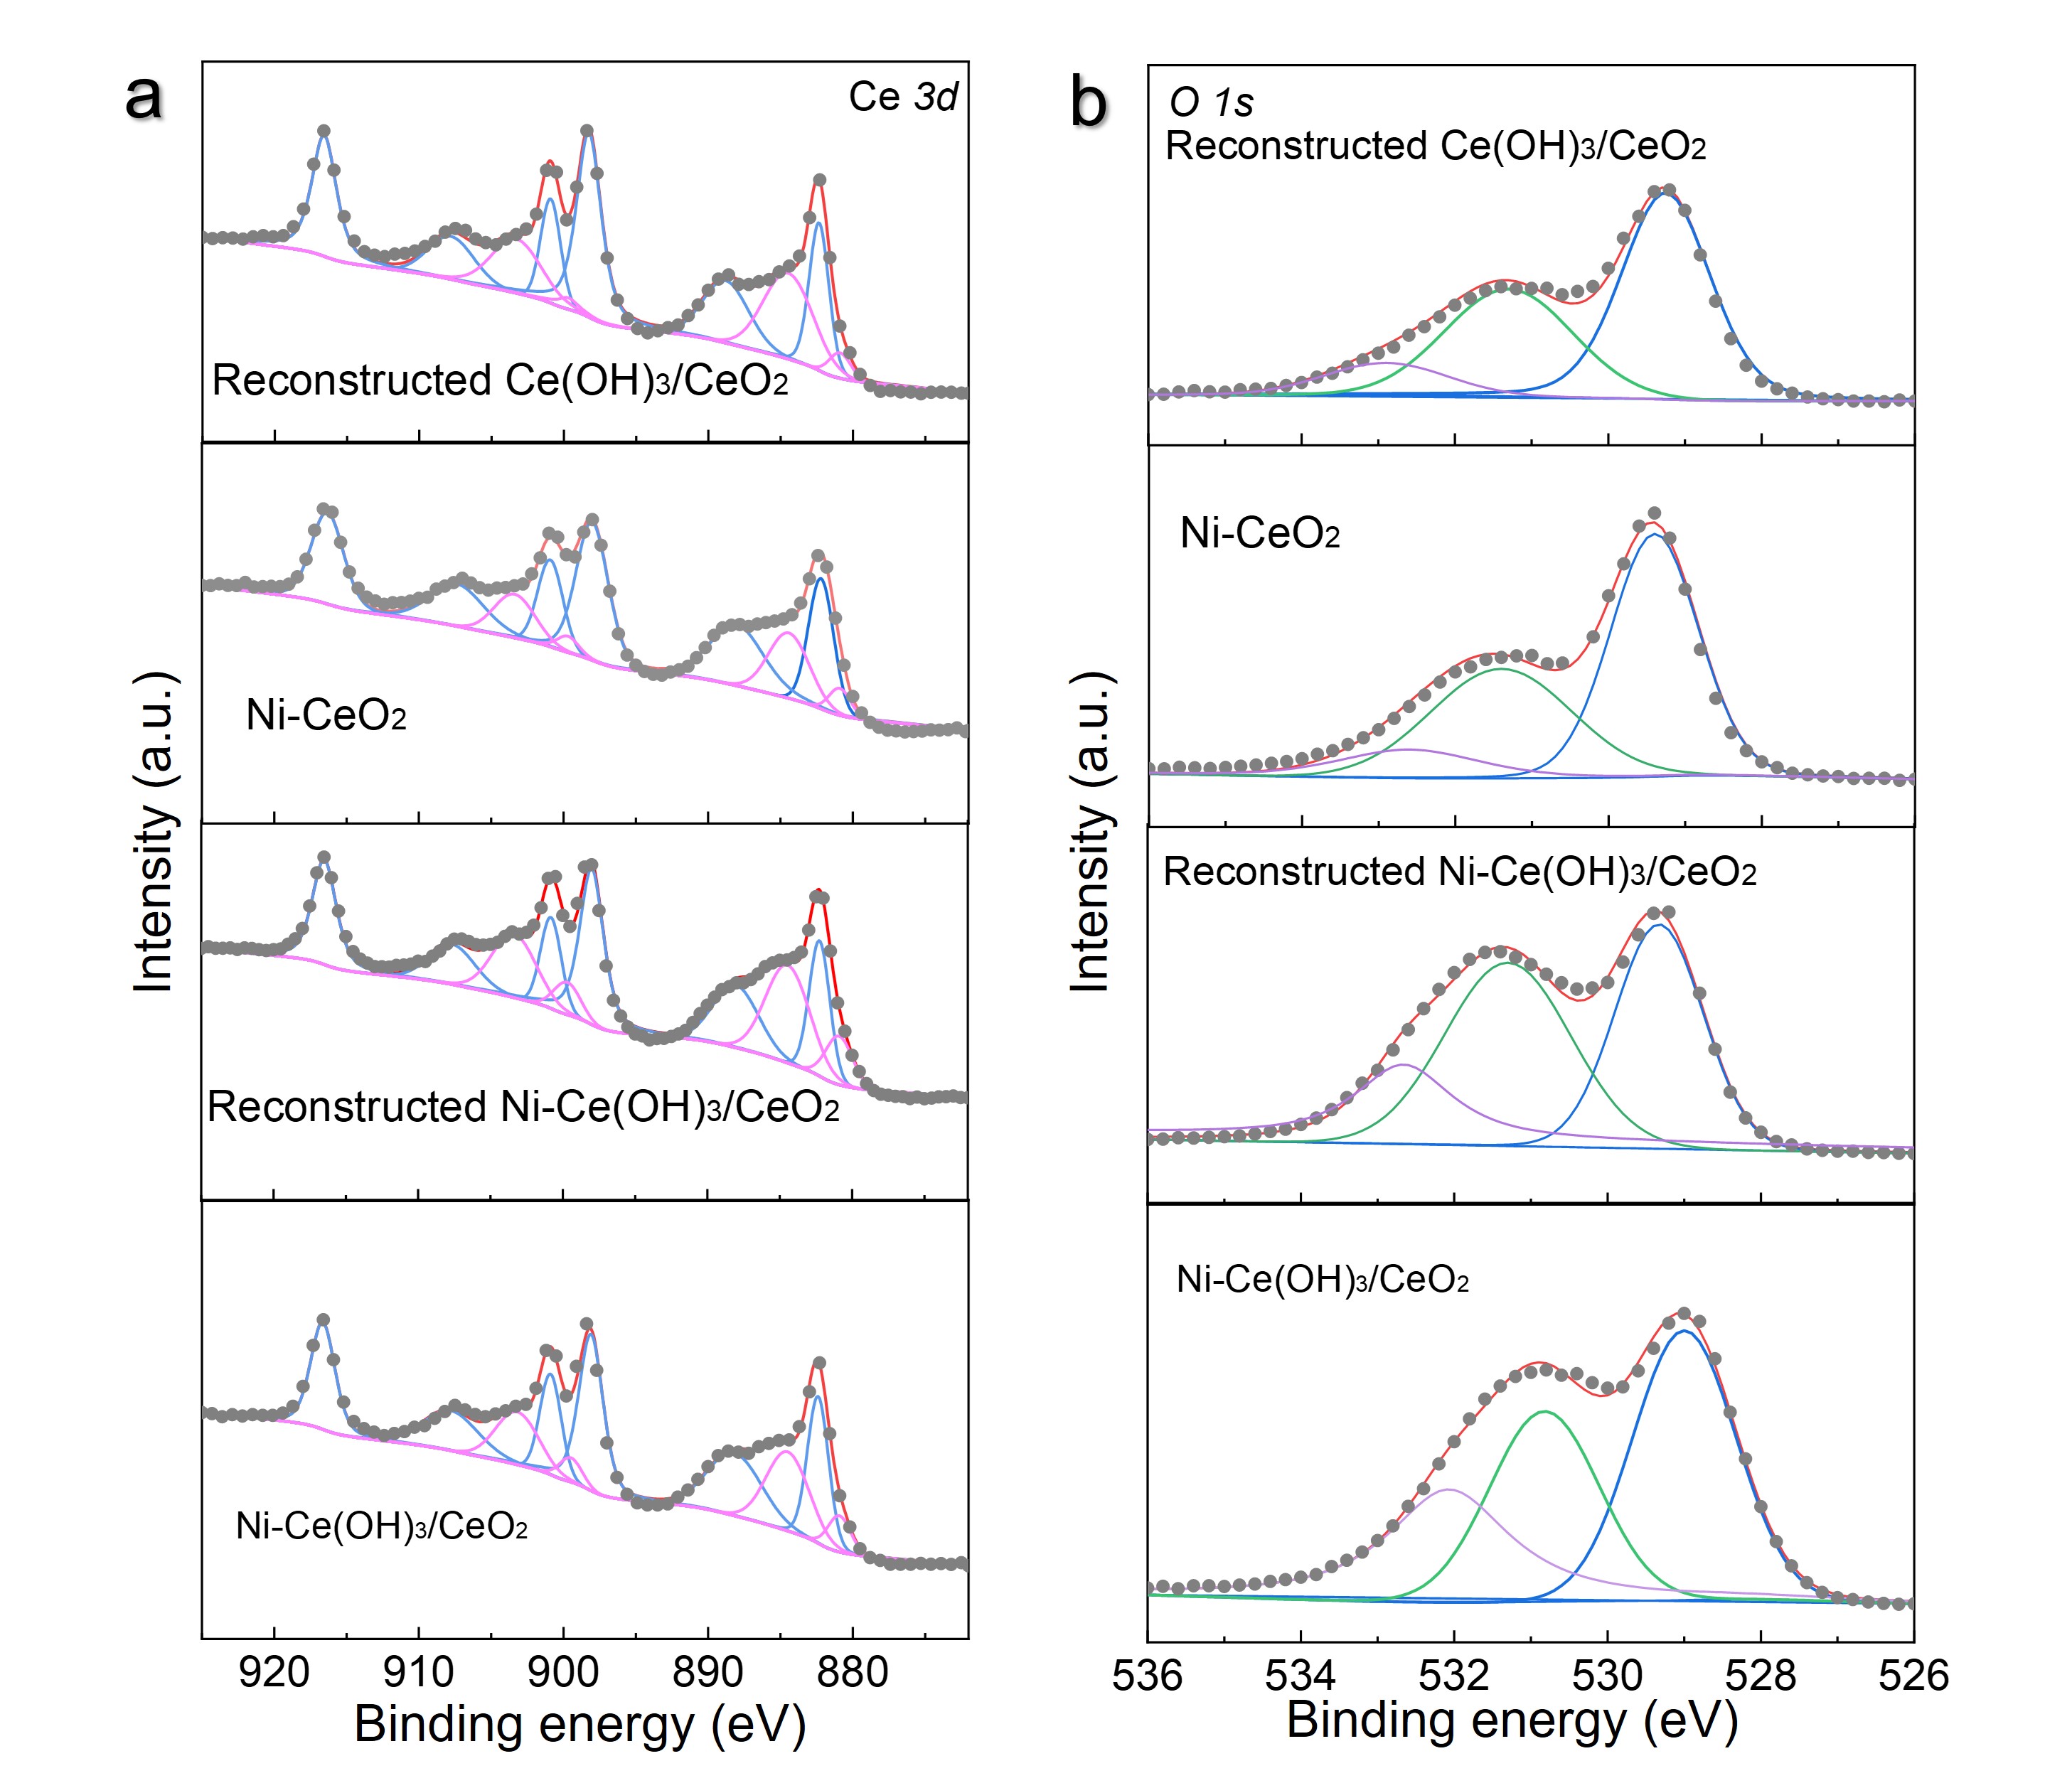


**Figure S16. XPS analysis.** XPS analysis of (**a**) Ce 3*d* and (**b**) O 1*s* peaks for reconstructed Ni-Ce(OH)3/CeO2, Ni-CeO2, reconstructed Ce(OH)3/CeO2 and Ni-Ce(OH)3/CeO2 catalysts.


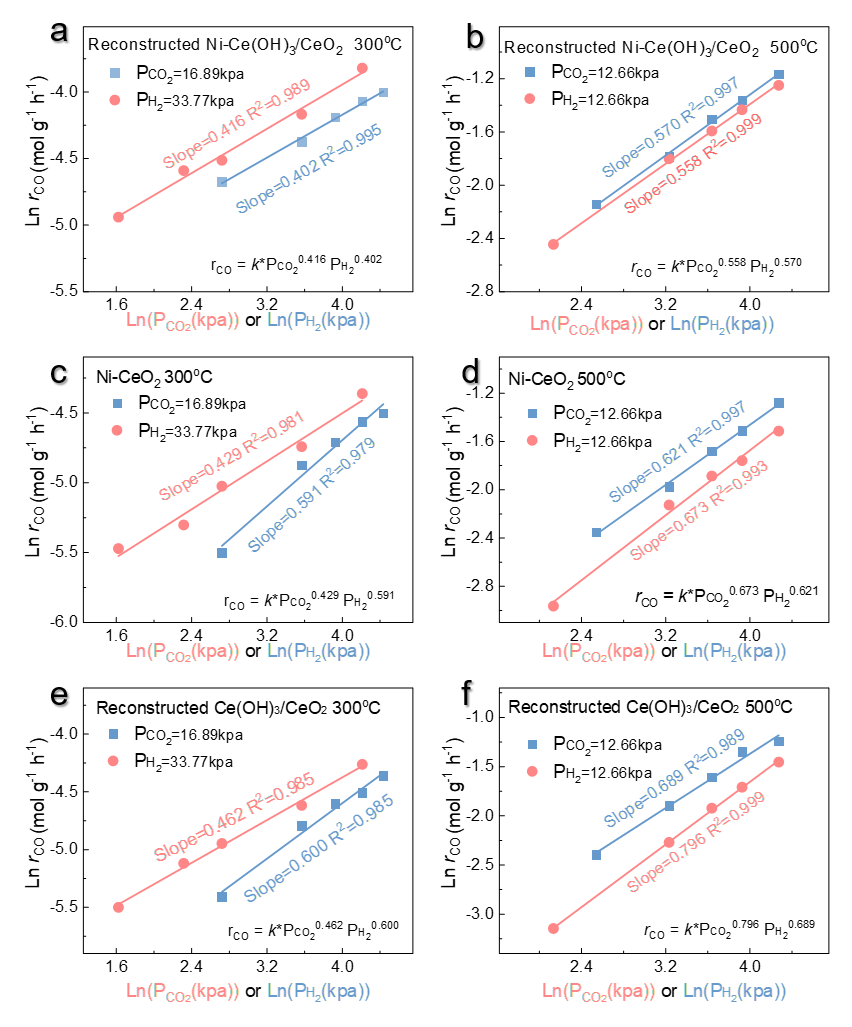


**Figure S17. Kinetic measurements of the reconstructed Ni-Ce(OH)3/CeO2, Ni-CeO2 and reconstructed Ce(OH)3/CeO2 catalysts.** Test results of the reconstructed Ni-Ce(OH)3/CeO2 catalyst at (**a**) 300 °C and (**b**) 500 °C. Test results of the Ni-CeO2 catalyst at (**c**) 300 °C and (**d**) 500 °C. Test results of the reconstructed Ce(OH)3/CeO2 catalyst at (**e**) 300 °C and (**f**) 500 °C. **Note:** The CO production rate serves as a function of CO2 and H2 concentrations on different catalysts. **Reaction conditions:** catalysts (40 mg), 100 mL min-1 of a gas flow (H2+CO2+N2), WHSV=150,000 mL g-1 min-1.


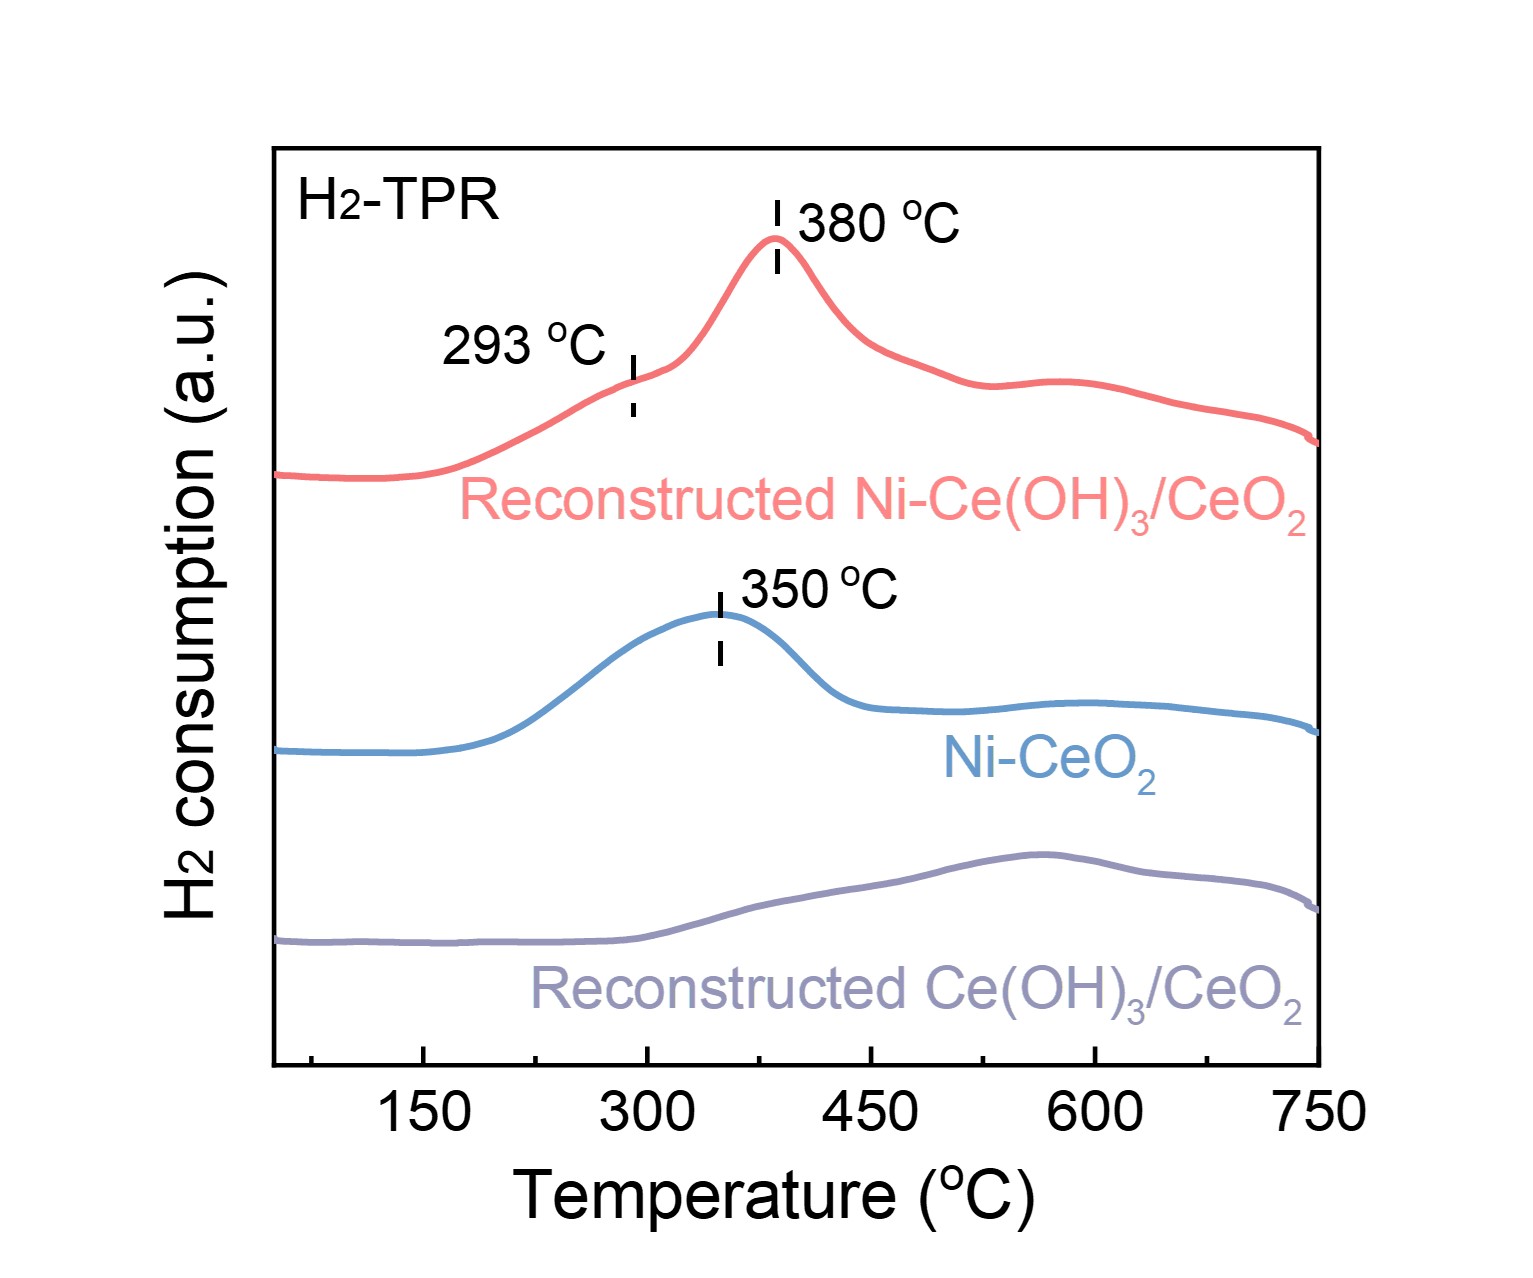


**Figure S18.** **H2-TPR of the reconstructed Ni-Ce(OH)3/CeO2, Ni-CeO2 and reconstructed Ce(OH)3/CeO2 catalysts.**


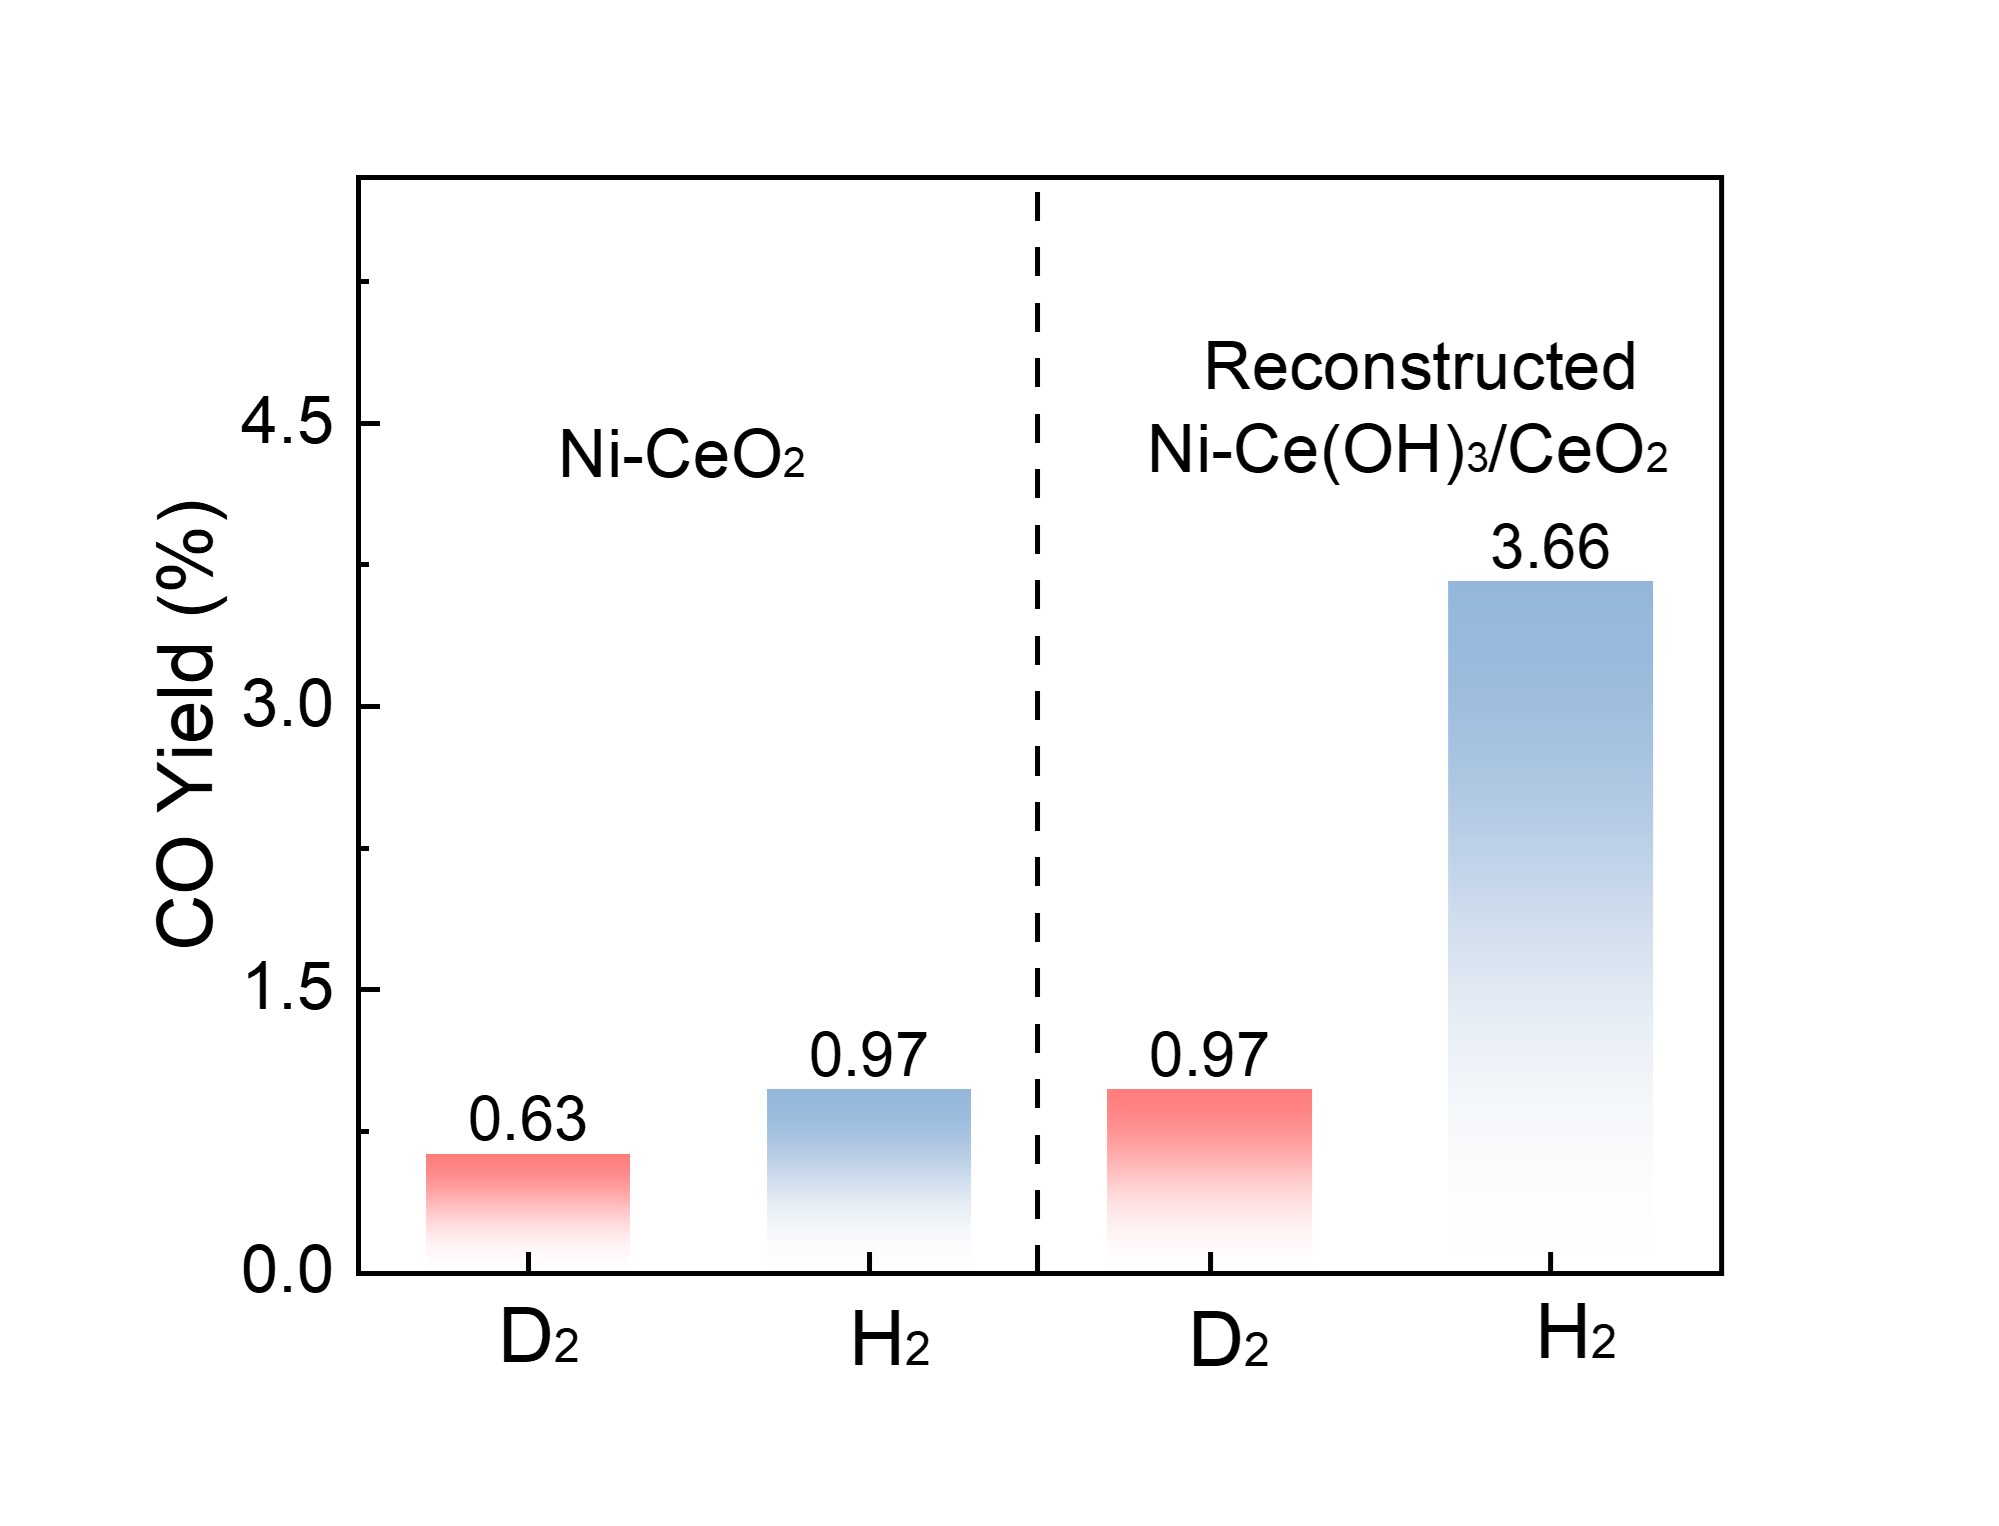


**Figure S19.** **H2/D2 isotope experiments on the reconstructed Ni-Ce(OH)3/CeO2 and Ni-CeO2 catalysts for the RWGS reaction**. **Reaction conditions:** 50 mg of catalysts, 20 mL min-1 of a gas flow (H2/D2: 15 mL min-1 + CO2: 5 mL min-1), WHSV=24,000 mL g-1 min-1.


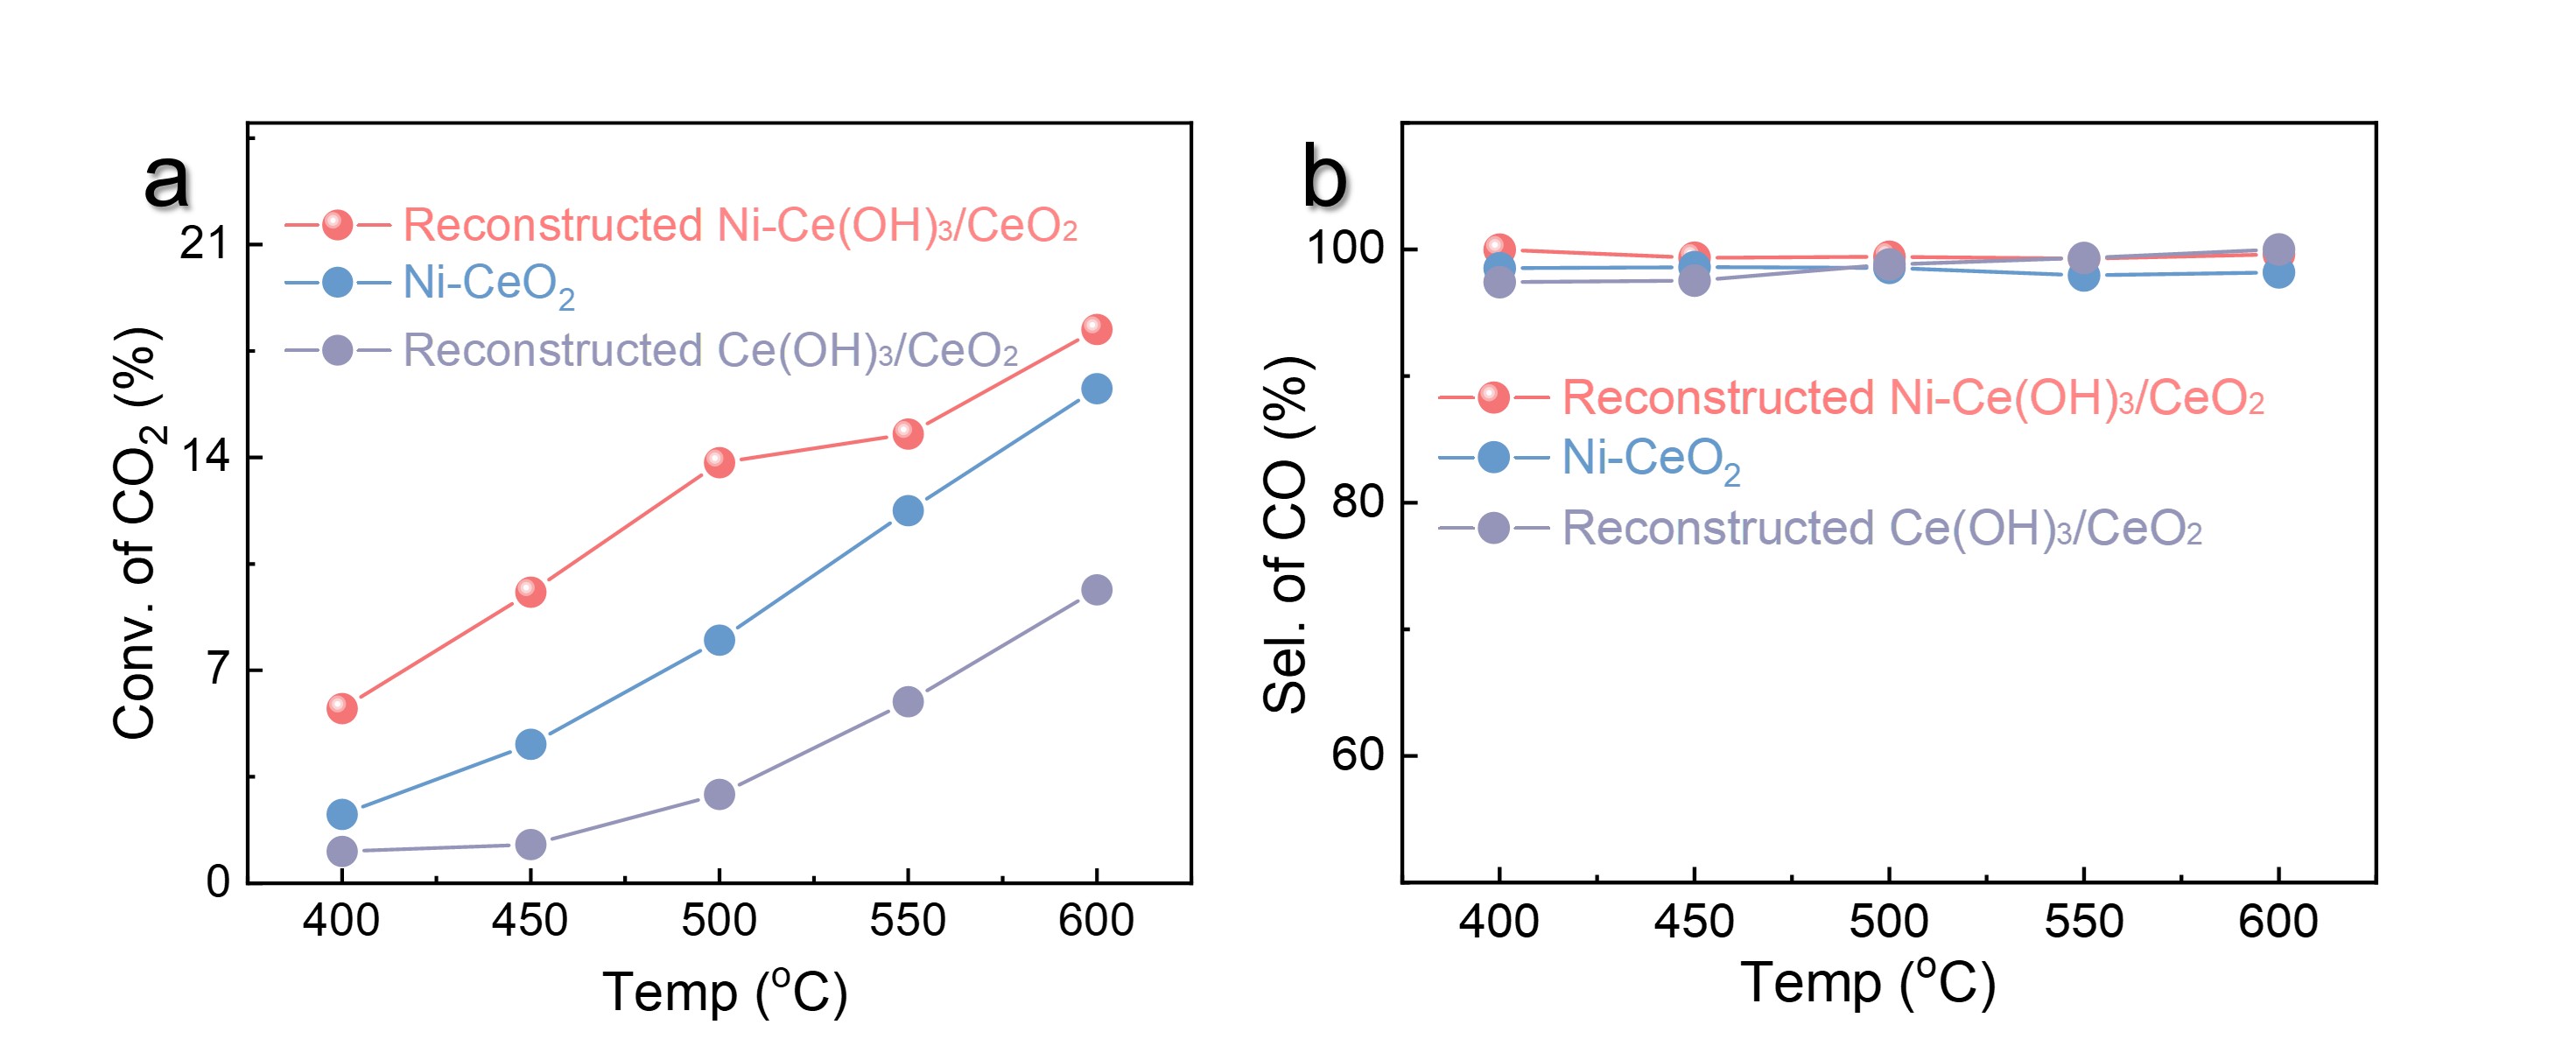


**Figure S20.** **Catalytic performance of the reconstructed Ni-Ce(OH)3/CeO2, Ni-CeO2 and reconstructed Ce(OH)3/CeO2 catalysts for RWGS reaction.** (**a**) CO2 conversions and (**b**) selectivity of CO as function of reaction temperatures. **Reaction conditions:** 10 mg of catalysts, 100 mL min-1 gas flow (H2: 75 mL min-1 + CO2: 25 mL min-1), WHSV=600,000 mL g-1 min-1.


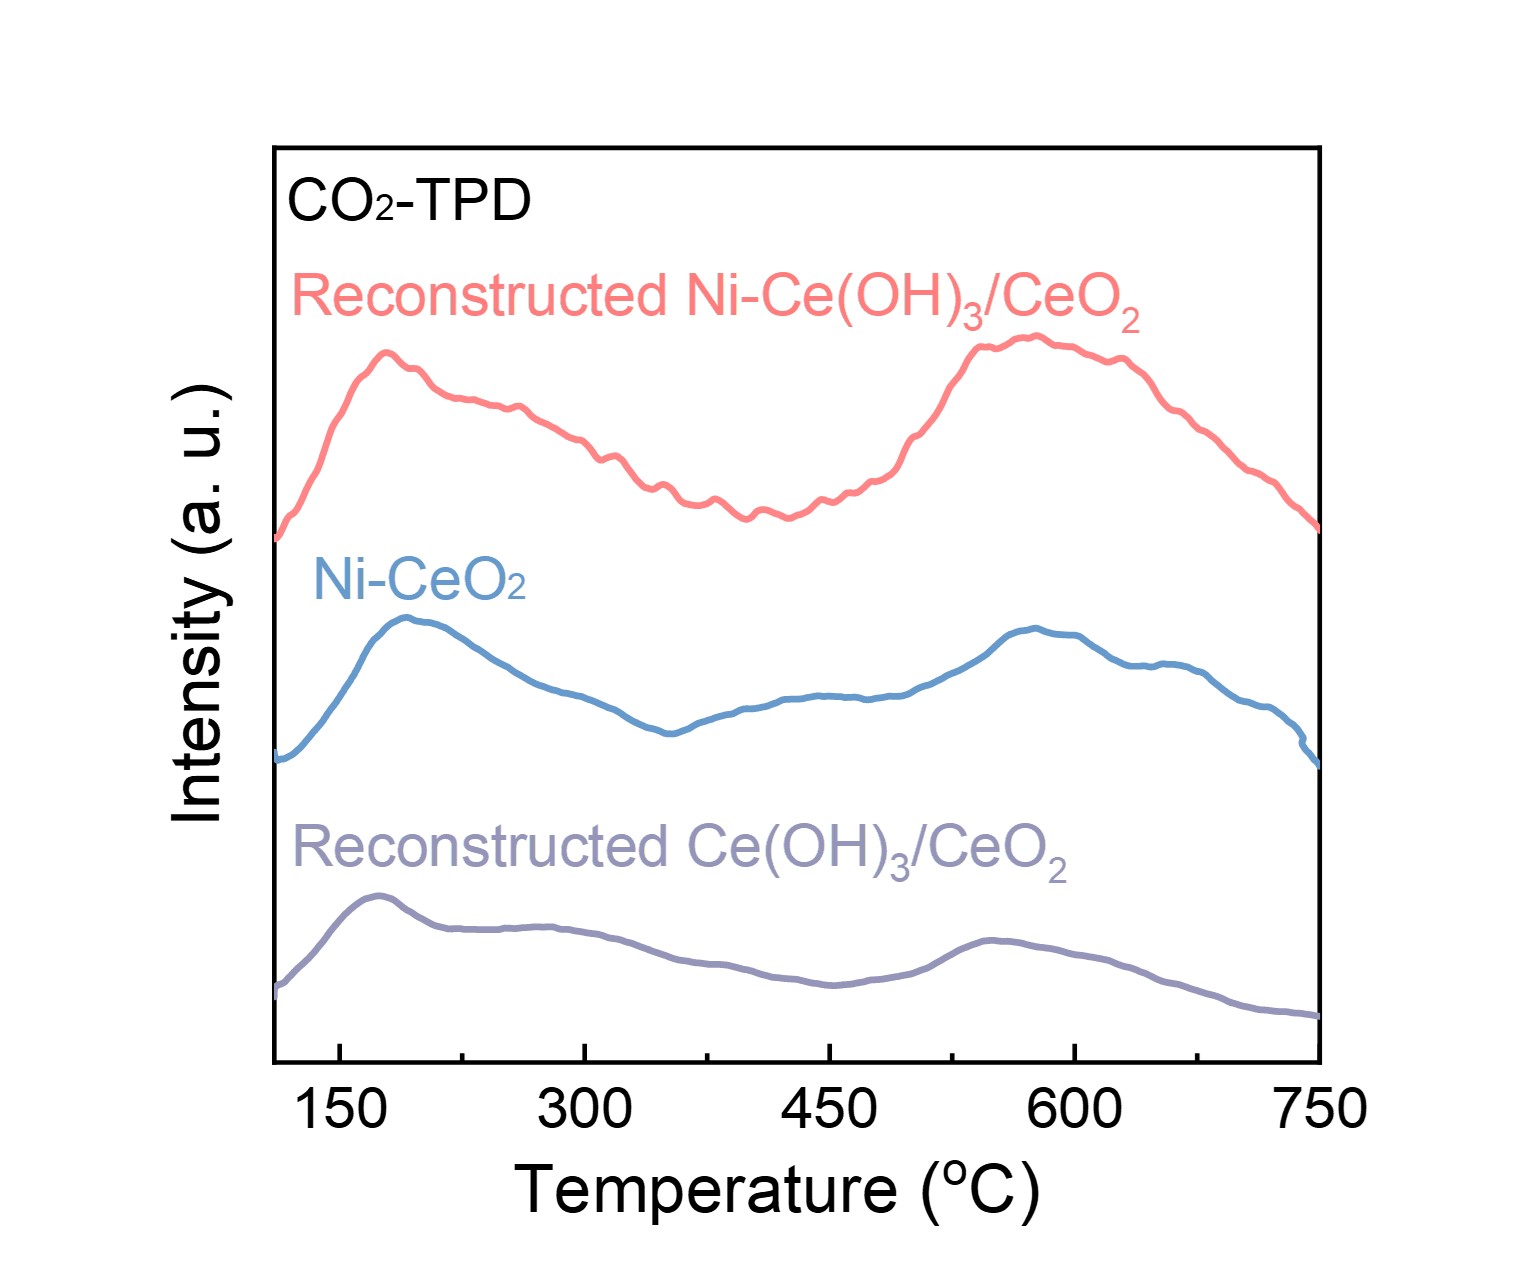


**Figure S21.** **CO2-TPD of the reconstructed Ni-Ce(OH)3/CeO2, Ni-CeO2 and reconstructed Ce(OH)3/CeO2 catalysts.**


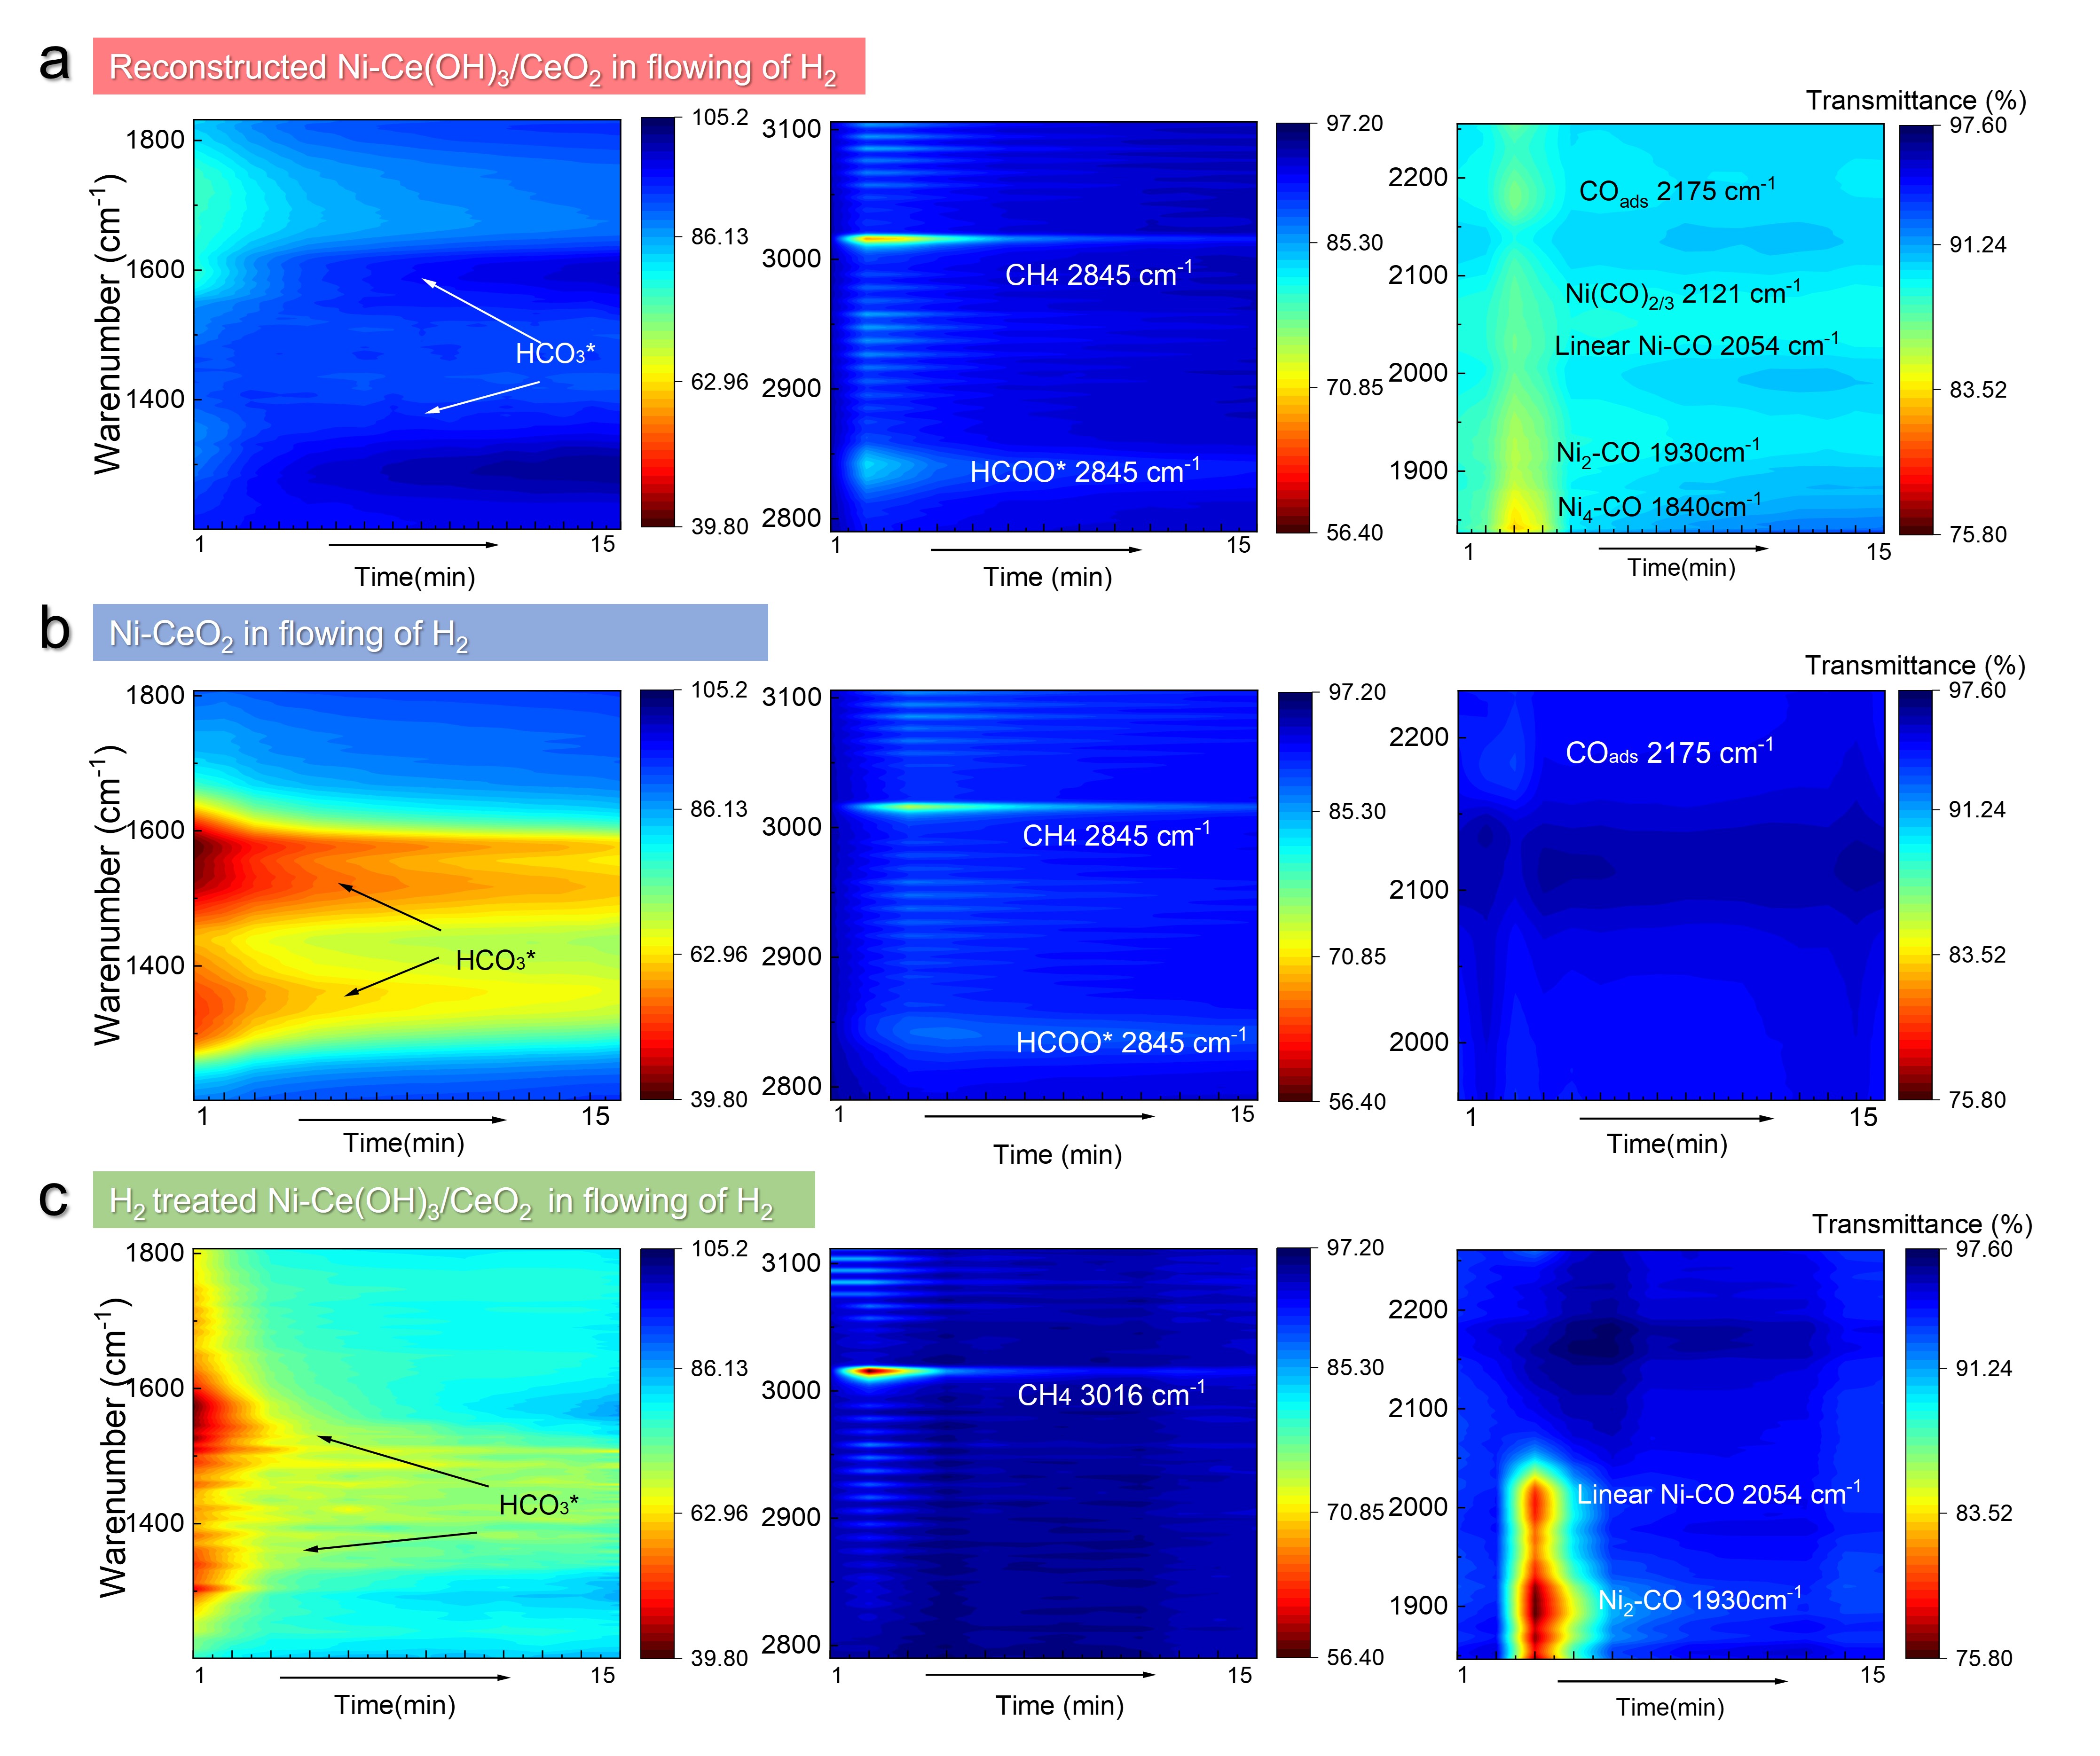


**Figure S22. *In situ* DRIFTS analysis.** *In situ* DRIFTS spectra of (**a**) reconstructed Ni-Ce(OH)3/CeO2 and (**b**) Ni-CeO2 under the flowing of CO2. **Note:** The catalysts underwent pre-treatment by a flow of 50 *vol.*% CO2/Ar (50 mL min-1) for 1 h. After removing excess CO2 by a flow of Ar (50 mL min-1), a flow of 50 *vol.*% H2/Ar (50 mL min-1) was introduced, and the DRIFTS signals were collected at 450 °C every 20 s during a period of 15 mins.


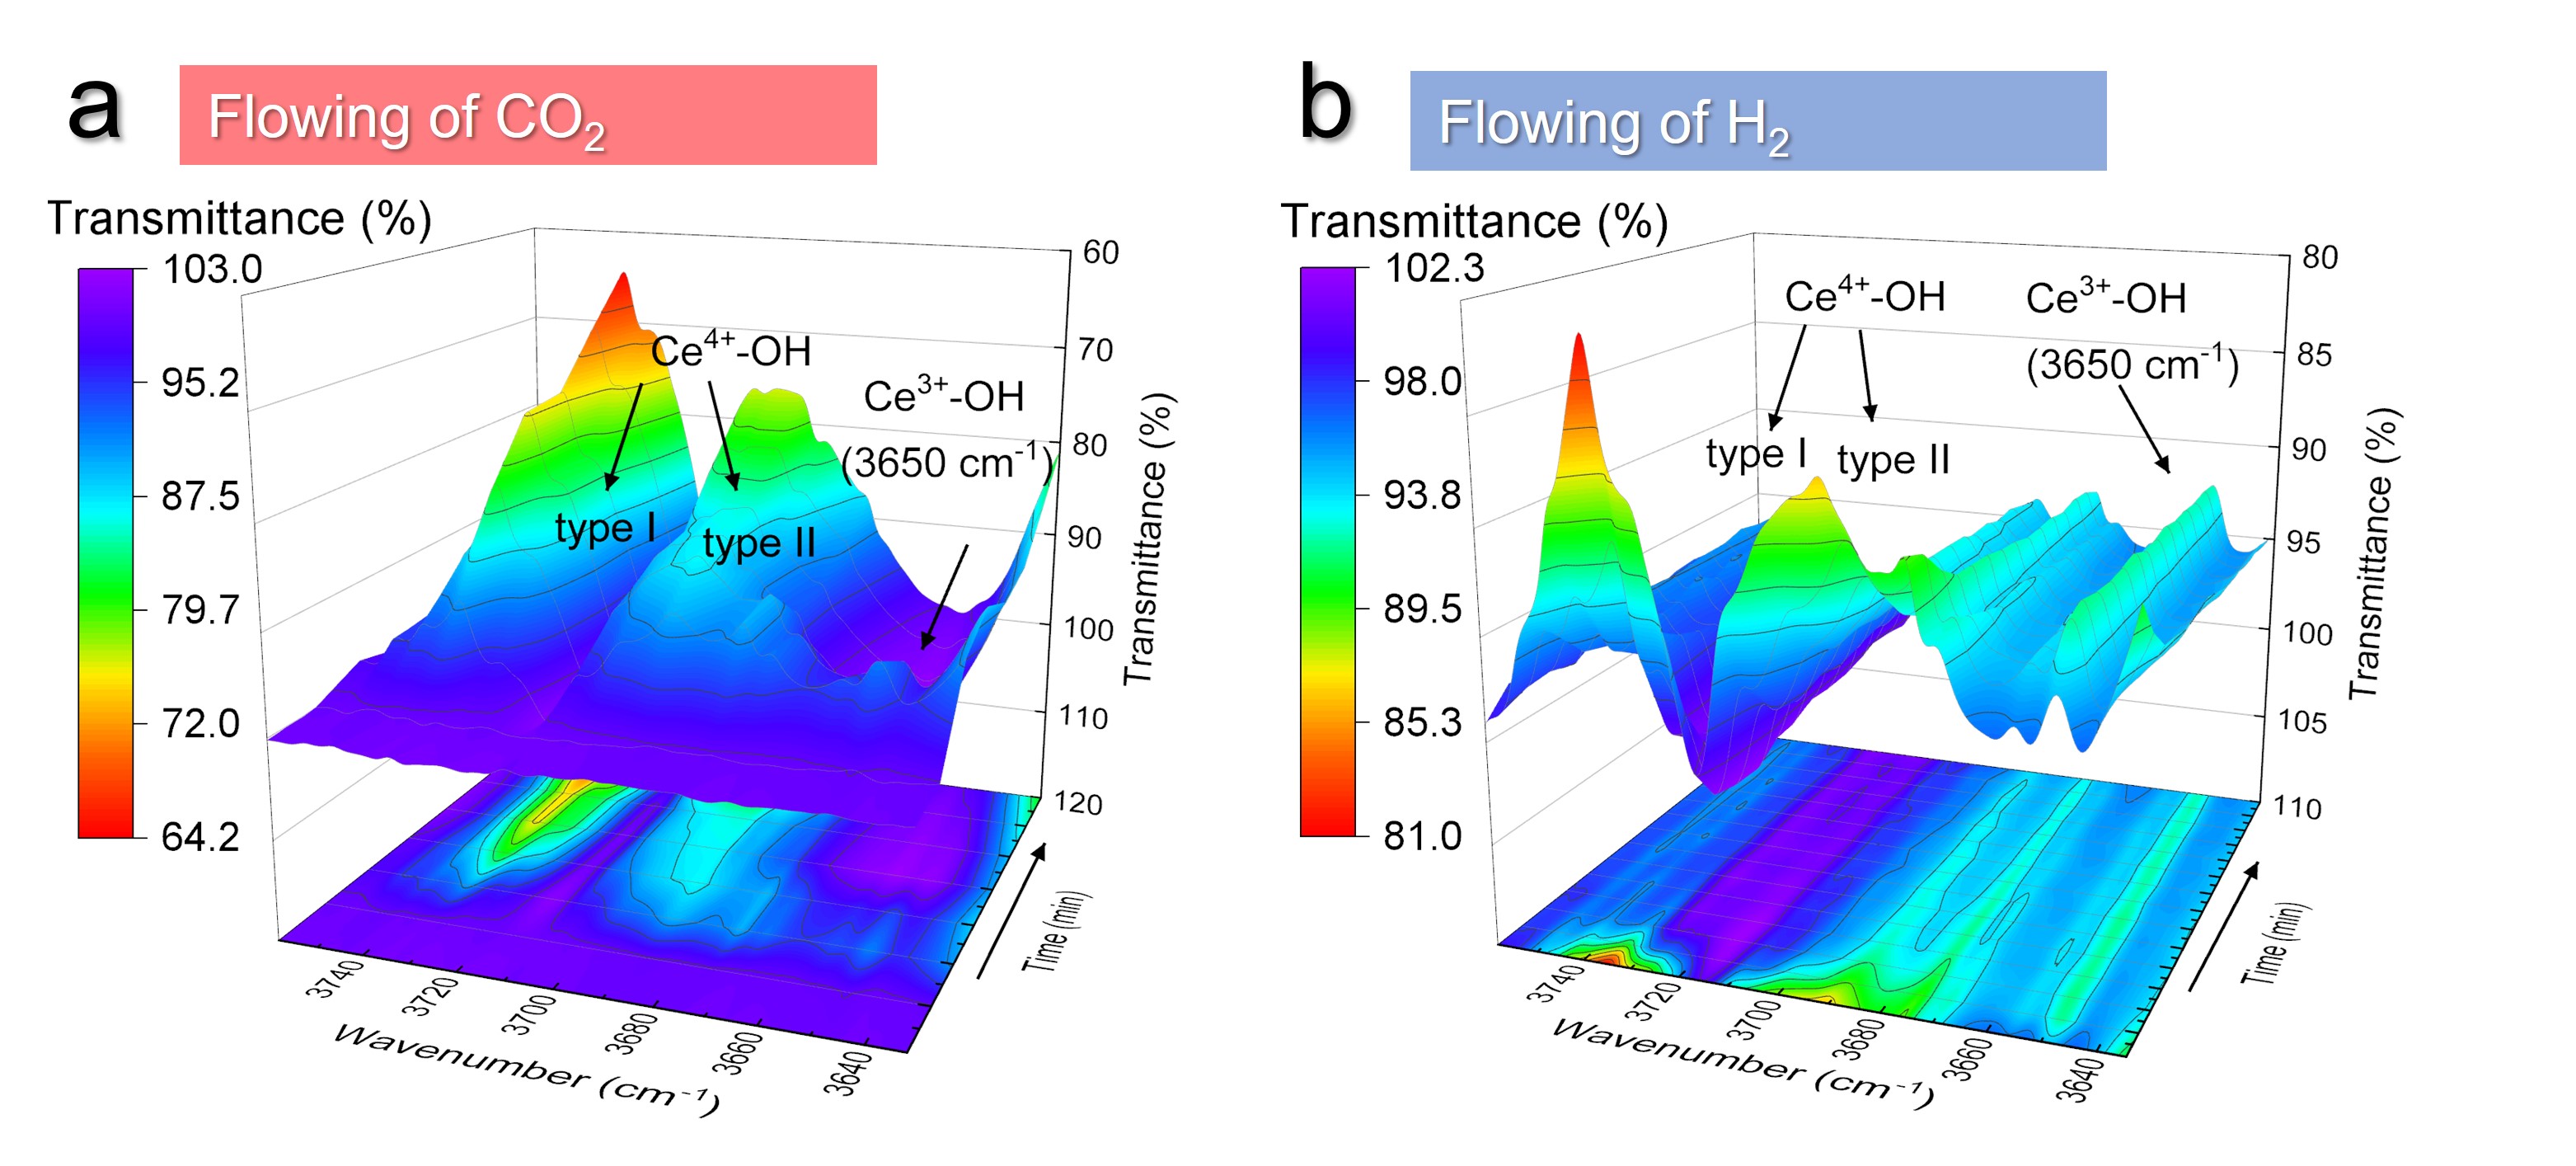


**Figure S23. *In-situ* DRIFTS spectra of the reconstructed Ni-Ce(OH)3/CeO2 under the flowing of CO2****and H2.** The reconstructed Ni-Ce(OH)3/CeO2 catalysts were pretreated by a flow of 50 *vol.*% H2/Ar (50 mL min-1) for 1 h. After removing of the free H2 by a flow of Ar (50 mL min-1) in the catalytic environments, a flow of 50 *vol.*% CO2/Ar (50 mL min-1) was introduced. The DRIFTS signals were collected at 450 °C every 20 s for a period of 15 mins. Subsequently, the flow of 50 *vol.*% CO2/Ar gas (50 mL min-1) was switched to a flow of 50 *vol.*% H2/Ar (50 mL min-1), which was kept for another 30 mins to collect the DRIFTS signal every 20 s.

**Table S1.** Summary of the catalytic performance of RWGS reaction.

| Catalysts | Temp  (℃) | WHSV  (mL g-1 h-1) | CO2 Conv.  (%) | CO Sel.  (%) | CO formation rate  (molCO gNi-1 h-1) | Ref. |
| --- | --- | --- | --- | --- | --- | --- |
| Reconstructed Ni-Ce(OH)3/CeO2 | 350 | 72,000 | 4.4 | 99.9 | 2.2 | This work |
| Reconstructed Ni-Ce(OH)3/CeO2 | 400 | 72,000 | 15.5 | 99.4 | 7.6 | This work |
| Reconstructed Ni-Ce(OH)3/CeO2 | 450 | 72,000 | 27.9 | 99.5 | 13.6 | This work |
| Reconstructed Ni-Ce(OH)3/CeO2 | 500 | 72,000 | 41.7 | 99.6 | 20.2 | This work |
| Reconstructed Ni-Ce(OH)3/CeO2 | 550 | 72,000 | 55.0 | 99.9 | 27.3 | This work |
| Reconstructed Ni-Ce(OH)3/CeO2 | 600 | 72,000 | 60.2 | 99.9 | 29.4 | This work |
| 15-Ni-CeO2 | 300 | 60,000 | 52 | 22.1 | 0.2 | 10 |
| 2.4-Ni/nSiO2 | 600 | / | 59.5 | 98.2 | 0.2 | 11 |
| 13.9-NiCuSap | 600 | 15,000 | 65.2 | 82.2 | 0.1 | 12 |
| 14.9-NiCoSap | 600 | 15,000 | 52.1 | 65.1 | 0.8 | 12 |
| Ni/CeO2 | 400 | 300,000 | 27.5 | 95.2 | 3.7 | 13 |
| 1.0-Ni-CeO2-NC | 400 | / | 18.1 | 99.9 | 0.04 | 14 |
| 1.0-NiO-CeO2-NC | 400 | / | 11.2 | 99.9 | 0.1 | 15 |
| 5.9-Ni@S16C | 500 | / | 20.2 | 93.1 | 2.5 | 16 |
| SpNi | 250 | 15,000 | 40.2 | 5.0 | 0.5 | 17 |
| 1.0-Ni-CeO2 | 350 | 18,000 | 99.9 | 10.9 | 1.4 | 18 |
| 1.0-Ni-CeO2 | 400 | 60,000 | 99.9 | 15.9 | 6.2 | 18 |
| NiMgO | 350 | / | 99.9 | / | 0.1 | 19 |
| Ni@N-CNTs | 350 | 12,000 | 99.0 | / | 0.4 | 20 |
| Ni@N-CNTs | 400 | 12,000 | 99.0 | / | 1.0 | 20 |
| Ni@N-CNTs | 450 | 12,000 | 98.0 | / | 1.4 | 20 |
| Ni@N-CNTs | 500 | 12,000 | 97.0 | / | 1.7 | 20 |
| NiMgO | 300 | 30,000 | 89.0 | 45.0 | 2.7 | 21 |
| Ni-Mg/SBA-15 | 350 | 30,000 | 87.0 | 62.0 | 3.6 | 21 |
| Ni-Mg/SBA-15 | 400 | 30,000 | 80.0 | 64.0 | 3.6 | 21 |
| 15.1-Ni2P/CeO2 | 400 | 150,000 | 66.0 | 50.0 | 7.3 | 22 |
| 15.1-Ni2P/CeO2 | 450 | 150,000 | 71.0 | 55.0 | 8.9 | 22 |
| 15.1-Ni2P/CeO2 | 500 | 150,000 | 82.0 | 70.0 | 14.2 | 22 |
| 15.1-Ni2P/CeO2 | 550 | 150,000 | 85.0 | 78.0 | 18.9 | 22 |
| 15.1-Ni2P/CeO2 | 600 | 150,000 | 94.0 | 90.0 | 24.6 | 22 |
| Ni/CeO2 | 400 | 12,000 | 62.0 | 12.0 | 0.2 | 23 |
| Ni/CeO2 | 500 | 12,000 | 72.0 | 17.0 | 0.3 | 23 |
| Ni/CeO2 | 600 | 12,000 | 74.0 | 18.0 | 0.3 | 23 |
| Ni-1Mo | 400 | 10,000 | 80.0 | 82.0 | 8.0 | 24 |
| Ni-MgO-CexZr1–xO2 | 300 | 50,000 | 8.0 | 80.0 | 0.1 | 25 |
| Ni-MgO-CexZr1–xO2 | 350 | 50,000 | 18.0 | 57.0 | 0.2 | 25 |
| Ni-MgO-CexZr1–xO2 | 400 | 50,000 | 42.0 | 20.0 | 0.2 | 25 |
| NiO/CeO2 | 400 | / | 5.0 | 99.9 | 0.5 | 26 |
| NiO/CeO2 | 500 | / | 20.0 | 99.9 | 1.6 | 26 |
| NiO/CeO2 | 600 | / | 33.0 | 99.9 | 4.8 | 26 |
| 1%Ni-CeO2 | 400 |  | 4.5 | 90.1 | 0.9 | 27 |
| l%Ni-CeO2 | 600 | 120,000 | 35.0 | 99.9 | 1.7 | 28 |
| Ni/CeO2-Al2O3 | 500 | 800,000 | 62.0 | 18.0 | 0.3 | 29 |
| Ni-CeZrOx | 700 | / | 50.1 | 95.0 | 6.5 | 30 |
| Ni/Al2O3 | 500 | 240,000 | 28.0 | 50.0 | 12.1 | 31 |
| Ni/Al2O3 | 550 | 240,000 | 33.0 | 64.0 | 18.0 | 31 |
| Ni/Al2O3 | 600 | 240,000 | 36.0 | 78.0 | 24.2 | 31 |
| Ni/Al2O3-CeO2 | 700 | 50,000 | 50.0 | 80.0 | 3.5 | 32 |

**Table S2.** The assignment of IR bands occurred in the DRIFTS experiments

| Wavenumber from the  literature (cm-1) | Wavenumber in the  experiment(cm-1) | Species | Ref. |
| --- | --- | --- | --- |
| 2163 | 2175 | COads | 18 |
| 2064 | 2125 | Ni-(CO)2/3 | 19 |
| 2030-2020 | 2057 | Ni-CO | 19 |
| 1930 | 1930 | Bridge Ni3-CO | 19 |
| 1850 | 1840 | Carbided Ni-CO | 33 |

**Reference:**

1 Kresse, G.; Furthmuller, J. Efficient Iterative Schemes for ab initio Total-Energy Calculations Using a Plane-Wave Basis Set. *Phys. Rev. B* **54**, 11169-11186, (1996).

2 Kresse, G.; Furthmuller, J. Efficiency of ab-initio Total Energy Calculation for Metals and Semiconductors Using a Plane-Wave Basis Set. *Comput. Mater. Sci.* **6**, 15-50, (1996).

3 Liu, B.; Liu, J.; Xin, L.; Zhang, T.; Xu, Y.; Jiang, F.; Liu, X. Unraveling Reactivity Descriptors and Structure Sensitivity in Low-Temperature NH3-SCR Reaction over CeTiOx Catalysts: A Combined Computational and Experimental Study. *ACS Catal.* **11**, 7613-7636, (2021).

4 Grimme, S.; Antony, J.; Ehrlich, S.; Krieg, H. A Consistent and Accurate ab initio Parametrization of Density Functional Dispersion Correction (DFT-D) for the 94 Elements H-Pu. *J. Chem. Phys.*, **132**, 154104, (2010).

5 Blöchl, P. E. Projector Augmented-Wave Method. *Phys. Rev. B*, **50**, 17953-17979, (1994).

6 Perdew, J. P.; Burke, K.; Ernzerhof, M. Generalized Gradient Approximation Made Simple. *Phys. Rev. Lett*. **77**, 3865-3868, (1996).

7 Filtschew, A.; Hofmann, K.; Hess, C. Ceria and Its Defect Structure: New Insights from a Combined Spectroscopic Approach. *J. Phys. Chem. C*, **120**, 6694-6703, (2016).

8 Zhang, S. *et al.* Interfacial frustrated Lewis pairs of CeO2 activate CO2 for selective tandem transformation of olefins and CO2 into cyclic carbonates. *J. Am. Chem. Soc.* **141**, 11353-11357, (2019).

9 Zhang, S. *et al.* Solid frustrated-Lewis-pair catalysts constructed by regulations on surface defects of porous nanorods of CeO2. *Nat Commun.* **8**, 15266, (2017).

10 Dai, B. *et al.* CO2 reverse water‐gas shift reaction on mesoporous M‐CeO2 catalysts. *Can. J Chem. Eng.* **95**, 634-642, (2016).

11 Gonçalves, R. V. *et al.* Selective hydrogenation of CO2 into CO on a highly dispersed nickel catalyst obtained by magnetron sputtering deposition: A step towards liquid fuels. *Appl. Catal. B-Environ.*  **209**, 240-246, (2017).

12 Nityashree, N. *et al.* Carbon stabilised saponite supported transition metal-alloy catalysts for chemical CO2 utilisation via reverse water-gas shift reaction. *Appl. Catal. B-Environ. l* **261**, 118241 (2020).

13 Ebrahimi, P., Kumar, A. & Khraisheh, M. A review of CeO2 supported catalysts for CO2 reduction to CO through the reverse water gas shift reaction. *Catalysts* **12**, 12101101 (2022).

14 Liu, Y., Li, Z., Xu, H. & Han, Y. Reverse water-gas shift reaction over ceria nanocube synthesized by hydrothermal method. *Catalysis Commun.* **76**, 1-6, (2016).

15 Cárdenas-Arenas, A. *et al.* Design of active sites in Ni/CeO2 catalysts for the methanation of CO2: tailoring the Ni-CeO2 contact. *Appl. Mater. Today* **19**, (2020).

16 Chen, C.-S., Budi, C. S., Wu, H.-C., Saikia, D. & Kao, H.-M. Size-tunable Ni nanoparticles supported on surface-modified, cage-type mesoporous silica as highly active catalysts for CO2 Hydrogenation. *ACS Catal.* **7**, 8367-8381, (2017).

17 Tada, S. *et al.* Sponge Ni catalyst with high activity in CO2 methanation. *Int. J. Hydrogen Energy* **42**, 30126-30134, (2017).

18 Shen, H. *et al.* Identifying the roles of Ce3+-OH and Ce-H in the reverse water-gas shift reaction over highly active Ni-doped CeO2 catalyst. *Nano Res.* **15**, 5831-5841, (2022).

19 Millet, M. M. *et al.* Ni single atom catalysts for CO2 activation. *J Am Chem Soc* **141**, 2451-2461, (2019).

20 Wang, D. D. *et al.* Ni single atoms confined in nitrogen-doped carbon nanotubes for active and selective hydrogenation of CO2 to CO. *ACS Catal.* **13**, 7132-7138, (2023).

21 Hongmanorom, P. *et al.* Enhanced performance and selectivity of CO methanation over phyllosilicate structure derived Ni-Mg/SBA-15 catalysts. *Appl. Catal. B-Environ.*  **282**, 119564 (2021).

22 Cui, S., Wang, X., Wang, L. & Zheng, X. Enhanced selectivity of the CO2 reverse water-gas reaction over a Ni2P/CeO2 catalyst. *Dalton Trans.* **50**, 5978-5987, (2021).

23 Gandara-Loe, J. *et al.* Design of full-temperature-range RWGS catalysts: Impact of alkali promoters on Ni/CeO2. *Energy Fuels* **36**, 6362-6373, (2022).

24 Zhang, R. *et al.* Tuning reverse water gas shift and methanation reactions during CO2 reduction on Ni catalysts via surface modification by MoOx. *J. CO2 Util.* **52**, 101678, (2021).

25 Kim, Y. *et al.* Highly CO-selective Ni-MgO-CexZr1–xO2 catalyst for efficient low-temperature reverse water–gas shift reaction. *J Ind. Eng. Chem.* **118**, 341-350, (2023).

26 Lu, B. & Kawamoto, K. Preparation of mesoporous CeO2 and monodispersed NiO particles in CeO2, and enhanced selectivity of NiO/CeO2 for reverse water gas shift reaction. *Mater. Res. Bull* **53**, 70-78, (2014).

27 Wang, L., Zhang, S. & Liu, Y. Reverse water gas shift reaction over Co-precipitated Ni-CeO2 catalysts. *Journal of Rare Earths* **26**, 66-70, (2008).

28 Wang, L., Liu, H., Liu, Y., Chen, Y. & Yang, S. Effect of precipitants on Ni-CeO2 catalysts prepared by a co-precipitation method for the reverse water-gas shift reaction. *J. Rare Earths* **31**, 969-974, (2013).

29 Yang, L., Pastor-Pérez, L., Gu, S., Sepúlveda-Escribano, A. & Reina, T. R. Highly efficient Ni/CeO2-Al2O3 catalysts for CO2 upgrading via reverse water-gas shift: Effect of selected transition metal promoters. *Appl. Catal. B-Environ.*  **232**, 464-471, (2018).

30 Sun, F.-m., Yan, C.-f., Wang, Z.-d., Guo, C.-q. & Huang, S.-l. Ni/Ce-Zr-O catalyst for high CO2 conversion during reverse water gas shift reaction (RWGS). *Int. J. Hydrogen Energy* **40**, 15985-15993, (2015).

31 Gioria, E. *et al.* Boosting the performance of Ni/Al2O3 for the reverse water gas shift reaction through formation of CuNi nanoalloys. *Catal. Sci. Technol.* **12**, 474-487, (2022).

32 Belekar, R. M. Suppression of coke formation during reverse water-gas shift reaction for CO2 conversion using highly active Ni/Al2O3-CeO2 catalyst material. *Phys. Lett* **395**, (2021).

33 Bertolini, J. C. & Tardy, B. Vibrational EELS studies of CO chemisorption on clean and carbided (111), (100) and (110) nickel surfaces. *Surf. Sci.* **102**, 131-150, (1981).
